1 **Vanishing White Matter Disease Expression of Truncated EIF2B5 Activates Induced Stress**  
2 **Response**

3  
4  
5 Matthew D. Keefe,<sup>1^</sup> Haille E. Soderholm,<sup>1^</sup> Hung-Yu Shih,<sup>1^</sup> Tamara J. Stevenson,<sup>1</sup> Kathryn A.  
6 Glaittli,<sup>1</sup> D. Miranda Bowles,<sup>1</sup> Erika Scholl,<sup>1</sup> Samuel Colby<sup>2</sup>, Samer Merchant<sup>2</sup>, Edward W.  
7 Hsu<sup>2</sup>, and Joshua L. Bonkowsky<sup>1,3\*</sup>

8  
9  
10 <sup>1</sup>Department of Pediatrics  
11 University of Utah School of Medicine  
12 Salt Lake City, Utah, USA  
13 <sup>2</sup>Department of Bioengineering  
14 University of Utah  
15 Salt Lake City, Utah, USA  
16 <sup>3</sup>Brain and Spine Center  
17 Primary Children's Hospital  
18 Salt Lake City, Utah, USA

19  
20  
21 ^Co- first authors  
22 \*Correspondence: [joshua.bonkowsky@hsc.utah.edu](mailto:joshua.bonkowsky@hsc.utah.edu)

23  
24  
25  
26  
27  
28  
29  
30

31 **Abstract**

32 Vanishing White Matter disease (VWM) is a severe leukodystrophy of the central nervous  
33 system caused by mutations in subunits of the eukaryotic initiation factor 2B complex (eIF2B).  
34 Current models only partially recapitulate key disease features, and pathophysiology is poorly  
35 understood. Through development and validation of zebrafish (*Danio rerio*) models of VWM,  
36 we demonstrate that zebrafish *EIF2B* mutants phenocopy VWM, including impaired somatic  
37 growth, early lethality, impaired myelination, loss of oligodendrocyte precursor cells, increased  
38 apoptosis in the CNS, and impaired motor swimming behavior. Expression of human *EIF2B2* in  
39 the zebrafish *EIF2B2* mutant rescues lethality and CNS apoptosis, demonstrating conservation of  
40 function between zebrafish and human. In the mutants, intron 12 retention leads to expression of  
41 a truncated *EIF2B5* transcript. Expression of the truncated *EIF2B5* in wild-type larva impairs motor  
42 behavior and activates the ISR, suggesting that a feed-forward mechanism in VWM is a  
43 significant component of disease pathophysiology.

44

45

46

47 **Keywords:** Vanishing white matter disease (VWM), EIF2B, leukodystrophy, induced stress  
48 response, zebrafish, MRI, myelin.

49

50 **Abbreviations:** Vanishing White Matter Disease (VWM); Magnetic Resonance Imaging (MRI);  
51 Induced Stress Response (ISR); Polymerase Chain Reaction (PCR); eukaryotic initiation factor  
52 2B (eIF2B); Central Nervous System (CNS)

## 53 **Introduction**

54 Vanishing White Matter (VWM) disease is a genetic leukodystrophy leading to severe  
55 neurological disease and early death (Fogli et al., 2004; van der Knaap et al., 2006; Labauge et  
56 al., 2009; Carra-Dalliere et al., 2011; Hamilton et al., 2018). VWM disease is caused by bi-allelic  
57 recessive variants in any of the five genes encoding subunits (1-5) of the eukaryotic translation  
58 initiation factor 2B (eIF2B) complex. Symptoms of VWM include ataxia, spasticity, seizures,  
59 cognitive impairment, and motor problems. While there are no sex differences seen in VWM  
60 patients, females can experience ovarian failure. In patients, autopsies have revealed affected  
61 oligodendrocytes and astrocytes, myelin loss, and cystic cavitations of white matter (van der  
62 Knaap et al., 1997; van der Knaap et al., 1998; Pronk et al., 2006). Genotype-phenotype  
63 correlations of mutation severity have been shown (Hamilton et al., 2018), and severe multi-  
64 organ involvement is characteristic of fetal and neonatal forms (van der Knaap et al., 2003; Song  
65 et al., 2017). Disease onset <4 years of age is followed by a rapid deterioration of symptoms,  
66 while disease onset >4 years of age shows greater variability in disease course (Hamilton et al.,  
67 2018). There is no treatment for VWM disease, and current mouse models only partially  
68 recapitulate disease pathophysiology (Geva et al., 2010; Dooves et al., 2016).

69 The eIF2B complex is a heteropentameric guanine nucleotide exchange factor (GEF) for  
70 eukaryotic initiation factor 2 (eIF2), which governs the rate of global protein synthesis and cap-  
71 dependent translation initiation. The eIF2B complex also functions to displace eIF5 from  
72 inactive GDP-bound eIF2 to allow its recruitment to the ribosome (Jennings and Pavitt, 2014).  
73 Importantly, the eIF2B complex plays a central role in the cellular integrated stress response  
74 (ISR). Stress-dependent kinase activation leads to phosphorylation of eIF2, which binds eIF2B  
75 more tightly and reduces overall protein synthesis (Krishnamoorthy et al., 2001; Pakos-

76 Zebrucka et al., 2016). In human cell lines, it has been shown that translation is suppressed to a  
77 greater degree after stress in VWM patients (Moon and Parker, 2018). This suppression of  
78 translation lasts for a longer period of time in VWM cells, and the protein responsible for de-  
79 phosphorylating eIF2 and allowing translation recovery, GADD34, was found in lower  
80 quantities.

81 Mouse lines with knock-in/knock-out mutations in *Eif2b5*<sup>R132H</sup>, a common allele of  
82 VWM patients, have impaired motor function, growth deficits, delayed development of white  
83 matter, and abnormal abundance of oligodendrocytes and astrocytes (Geva et al., 2010; Atzmon  
84 et al., 2018). This developmental role for eIF2B was further confirmed in a mouse model with  
85 developmental misexpression of pancreatic endoplasmic reticulum kinase (PERK) in  
86 oligodendrocytes. PERK is one of the stress-responsive kinases that activate the ISR via  
87 phosphorylation of eIF2. PERK misexpression caused hypomyelination, oligodendrocyte  
88 damage, and myelin loss (Lin et al., 2014). However, this result was only seen in young mice,  
89 and could not be induced in mature animals.

90 ISR activation has been identified in VWM patient brain autopsy samples (van  
91 Kollenburg et al., 2006) and in mouse VWM models (Wong et al., 2019; Abbink et al., 2019). A  
92 small molecule inhibitor of the ISR, ISRIB, has been shown to bind to and activate the  
93 decameric, functional eIF2B complex (Sidrauski et al., 2013; Sidrauski et al., 2015; Wong et al.,  
94 2018).

95 There are key aspects that remain unclear about eIF2B function and its involvement in  
96 VWM pathophysiology. eIF2B is expressed globally but VWM primarily affect the CNS,  
97 including differential effects in the CNS. For example, oligodendrocyte numbers are decreased in  
98 affected white matter, but they are increased in other areas (van Haren et al., 2004; Bugiani et al.,

99 2010). GEF activity of the eIF2B complex does not appear to correlate with VWM disease  
100 severity (Liu et al., 2011), suggesting that the overall protein translation is not the key  
101 component of VWM pathophysiology. Another unusual and poorly understood aspect of VWM  
102 is that rapid clinical deterioration and white matter loss can be provoked by a stressor, such as  
103 minor head trauma or mild illness (van der Knaap et al., 2006). This is consistent with models in  
104 which chronic ISR activation cause cellular apoptosis (Bond et al., 2020), but the mechanism by  
105 which VWM mutation affects ISR response is unclear. Further, there is some evidence that a de-  
106 regulated ISR is not alone sufficient to cause VWM pathology (Wisse et al., 2018), and in fact  
107 blocking the ISR worsens VWM pathology (Sekine et al., 2016). Thus, current models and  
108 approaches have left key questions unanswered.

109 We report the development and characterization of a small vertebrate (zebrafish – *Danio*  
110 *rerio*) model of VWM. We have generated and characterized mutant alleles in zebrafish *eif2b*  
111 subunits 1, 2, and 4, and an allelic series in subunit 5. We demonstrate that the *eif2b* mutants  
112 exhibit a range of phenotypic severity, including changes in growth, lethality, behavior,  
113 myelination, apoptosis and proliferation in the CNS. We also show conservation of function of  
114 *eif2b2* between zebrafish and humans, validating the zebrafish model for understanding human  
115 VWM. We find that the *eif2b* mutants at baseline have activated induced stress response (ISR).  
116 The zebrafish *eif2b* mutants have impaired swimming motor behavior, a phenotype that could be  
117 used in a phenotype-based screen. Finally, we found that in the zebrafish *eif2b* mutants, a  
118 truncated *eif2b5* transcript is generated. The truncated *eif2b5* is capable of activating the ISR,  
119 and can impair motor behavior, suggesting that a feedback loop with truncated *eif2b5* may play  
120 an important role in disease pathology. Our work reveals a similar role for the *eif2b* complex in

121 zebrafish and in humans, identifies a novel mechanism of VWM pathophysiology, and provides  
122 a useful model of VWM for future therapeutics screening.

123

124

125

126

127

## 128 **Results**

### 129 **Phylogenetic analysis of EIF2B sequence homology and expression in zebrafish** 130 **development**

131 We characterized the sequence and developmental expression of the five Eif2b subunit  
132 orthologs in zebrafish, *eif2b1-5* (*eif2b1*, ENSDARG00000091402; *eif2b2*  
133 ENSDARG00000041397; *eif2b3*, ENSDARG00000018106; *eif2b4*, ENSDARG00000014004;  
134 *eif2b5*, ENSDARG00000074995). Each human *EIF2B* subunit gene has a single zebrafish  
135 ortholog with a conserved amino acid sequence (**Figure 1A**). The Eif2b zebrafish and human  
136 protein structures also show conserved structural domains (**Figure 1B**). We evaluated *eif2b*  
137 genes expression during early development. Expression analysis of zebrafish *eif2b* genes at 24  
138 hpf (hours post-fertilization) showed expression chiefly in the brain and eye (**Figure 1C-G**).  
139 By 72 hpf expression was clearly noted throughout the animal, with higher levels in the brain  
140 (**Figure 1H-L**). Quantitative RT-PCR analysis revealed sub-unit specific expression changes in  
141 the first seven days of life (**Figure 1M-Q**).

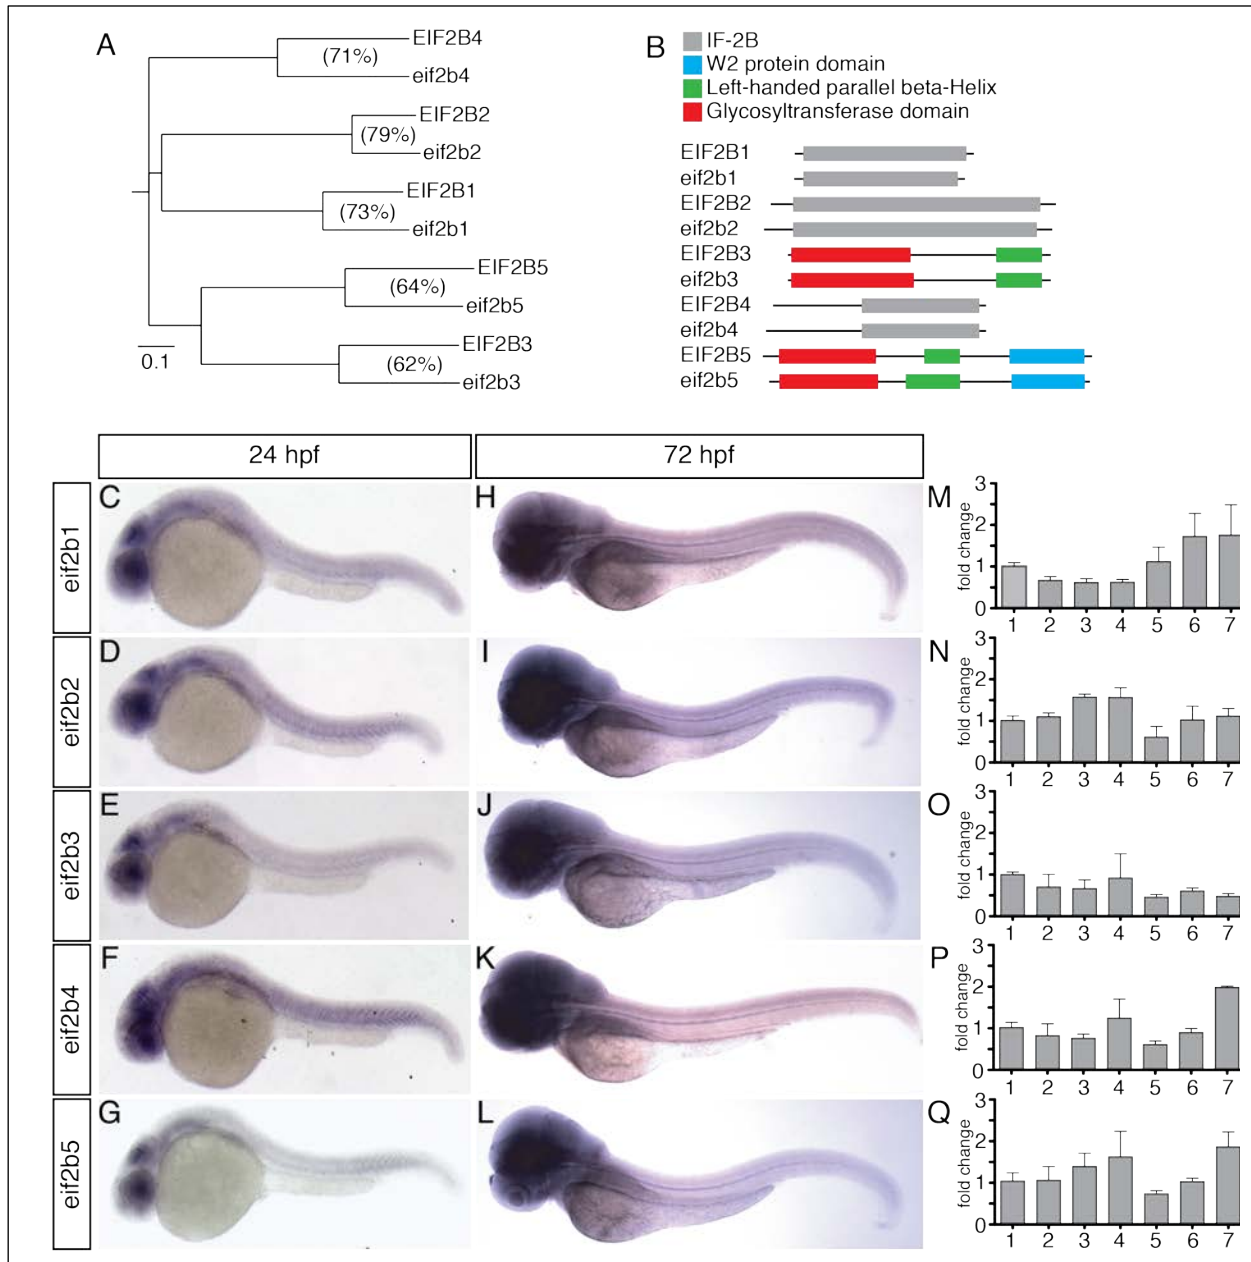

142 **Figure 1.**

143 **Figure 1.** Phylogenetic and expression analysis of Eif2b orthologs in zebrafish during  
 144 development. (A) A horizontal cladogram of *eif2b1-5* gene sequences shows that zebrafish have  
 145 a single ortholog of each human *EIF2B* gene, and a relative conservation of amino acid sequence  
 146 between orthologs. Scale bar equals an evolutionary distance of 0.1 amino acid changes per  
 147 position in the sequence (Phylodendron). (B) Comparison of zebrafish and human EIF2B protein  
 148 sequences shows conserved domain architectures. (C-L) Whole mount *in situ* expression analysis  
 149 in zebrafish embryos and larvae, brightfield microscopy, rostral left, dorsal top. (C-E) *eif2b*  
 150 subunit genes at 24 hpf shows predominantly brain and eye expression, with lower levels of  
 151 expression throughout the embryo. (H-L) *eif2b* subunit genes at 72 hpf shows higher expression  
 152 throughout the animal and in the brain compared to 24 hpf. (M-Q) qRT-PCR expression of *eif2b*

153 subunit genes from 24 hpf through 7 dpf, normalized to 24 hpf expression demonstrates variable  
154 expression changes across development.

155 **Figure 1- Source Data 1:** Quantification of qRT-PCR results of *eif2b* subunits.

156  
157

## 158 **Zebrafish *eif2b* subunit mutant alleles generation and molecular characterization**

159 We obtained zebrafish mutant alleles for three *eif2b* subunit genes from the Sanger

160 Institute Zebrafish Mutation Project (*eif2b1*, ENSDARG00000091402; *eif2b2*

161 ENSDARG00000041397; *eif2b4*, ENSDARG00000014004) (**Figure 2A-C**) (15). *eif2b1*

162 (sa12357) harbors a T/A transversion resulting in an early stop in exon 8 (**Figure 2A**); *eif2b2*

163 (sa17223) has a G/A transition in exon 5, mutating an essential splice site (**Figure 2B**); and

164 *eif2b4* (sa17367) has a G/A transition in exon 12 mutating an essential splice site (**Figure 2C**).

165 To mutagenize subunit *eif2b5*, we used the Clustered Regularly Interspaced Short Palindromic

166 Repeats (CRISPR)/Cas9 system and created six different alleles by targeting exon 1 (**Figure**

167 **2D**). This created three alleles (*zc101*, *zc103*, and *zc104*) with in-frame deletions leading to loss

168 of amino acids; two alleles with a combination of amino acid loss and missense mutations

169 (*zc105* and *zc106*); and one allele (*zc102*) with a nonsense mutation that caused a frame shift in

170 exon 1 leading to a premature stop codon in exon 2. Following CRISPR mutagenesis,

171 individual G0 fish were outcrossed to wild-type animals and offspring were screened by high-

172 resolution melt analysis (HRMA) PCR (Xing et al., 2014). In addition to HRMA PCR

173 genotyping, we confirmed genotypes by Sanger sequencing both in the G0 and subsequent

174 generations. cDNA sequencing of *eif2b2*<sup>sa17223</sup>, *eif2b5*<sup>zc102</sup> and *eif2b5*<sup>zc103</sup> confirmed that the



175

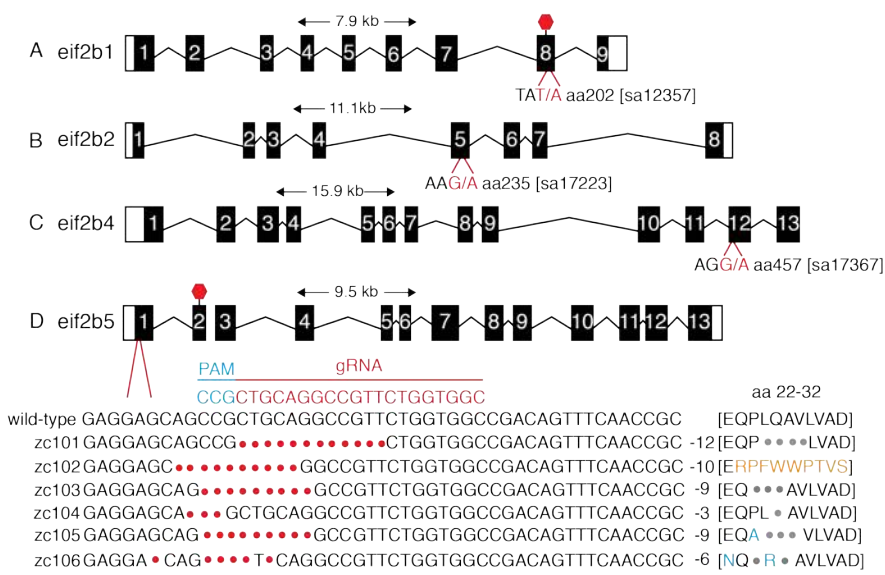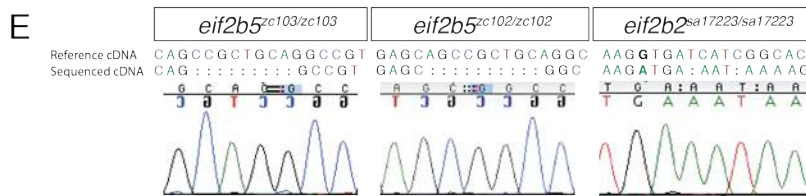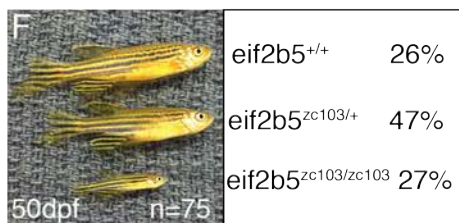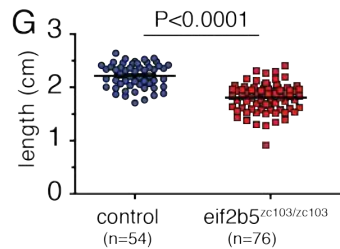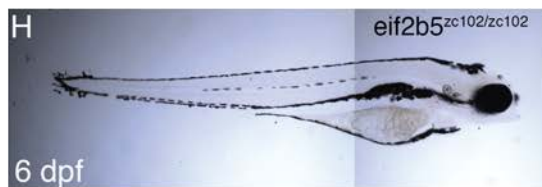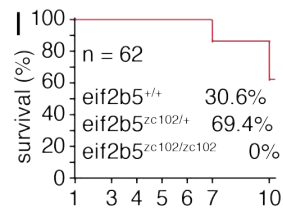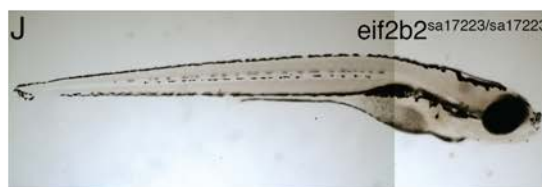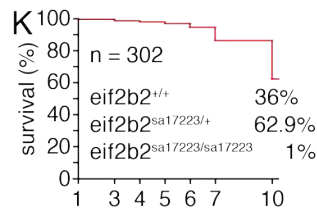

**L** ● wild-type ■ *eif2b5<sup>zc103/zc103</sup>*

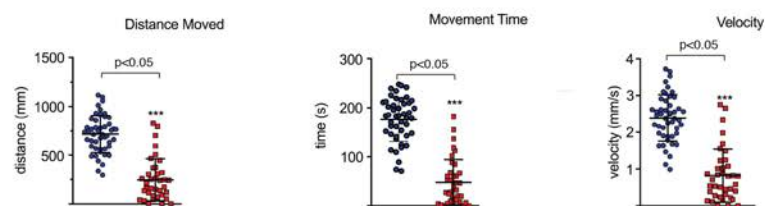

176 **2E).** We tried western blotting with several commercial antibodies against Eif2b2 and Eif2b5  
177 (Eif2B2 Abcam 133848; Eif2B5 Abcam ab91563, GeneTex 30808, Santa Cruz 514056, ProSci  
178 56-847, Bethyl A302-557A) but none gave a specific band.

179 **Figure 2.** Zebrafish *eif2b* allele generation and characterization. A-D Depiction of zebrafish  
180 *eif2b* subunits exon structure and the location and nucleotide change for each mutant. (A) *eif2b1*  
181 harbors a T/A transversion resulting in an early stop in exon 8. (B) *eif2b2* has a G/A transition in  
182 exon 5, mutating an essential splice site. (C) *eif2b4* has a G/A transition in exon 12 mutating an  
183 essential splice site. (D) *eif2b5* exon 1 was targeted for mutagenesis using a gRNA (red). Six  
184 distinct alleles were recovered (described in text). (E) Chromatograms of cDNA confirm  
185 presence of predicted mutations for *eif2b5<sup>zc103/zc103</sup>*, *eif2b5<sup>zc102/zc102</sup>*, and *eif2b2<sup>sa17223/sa17223</sup>*. (F)  
186 *eif2b5<sup>zc103/zc103</sup>* mutants survive until adulthood in Mendelian ratios, but show grow defects  
187 compared to their heterozygous and wild-type siblings. (G) Adult *eif2b5<sup>zc103/zc103</sup>* lengths are  
188 significantly shorter compared to their wild-type and heterozygous siblings. (H) Bright-field  
189 (BF) image of 6 dpf *eif2b5<sup>zc102/zc102</sup>* larva shows a lack of swim bladder and a small head. (I)  
190 Kaplan-Meyer survival curves from an *eif2b5<sup>zc102/+</sup>* heterozygous incross shows that all  
191 homozygotes were dead by 10 dpf (total n = 62). (J) Similar to the *eif2b5<sup>zc102/zc102</sup>*, a BF image of  
192 6 dpf *eif2b2<sup>sa17223/sa17223</sup>* shows a lack of swim bladder and a small head. (K) Kaplan-Meyer  
193 survival curves from an *eif2b2<sup>sa17223/+</sup>* heterozygous incross shows 1% (n=3) homozygote  
194 survival at 10 dpf (total n = 302); however no homozygotes live past two weeks of age. (L)  
195 Motor swimming analysis shows impaired swimming behavior in mutants. Distance moved, time  
196 spent moving, and velocity, for wild-type controls, and *eif2b5<sup>zc103/zc103</sup>* mutants, at 5 dpf.  
197 **Figure 2- Source Data 1:** Quantification of lengths.  
198 **Figure 2- Source Data 2:** Quantification of behavior results.

199  
200  
201 Most of the alleles in the different subunits were homozygous viable, and  
202 survived to adulthood and were fertile. The *eif2b5<sup>zc103/zc103</sup>* mutants showed a decrease in size  
203 compared to their wild type and heterozygous siblings (2.2 cm vs 1.8 cm, 0.3 and 0.2 S.D., and  
204 p<0.0001) (**Figure 2F-G**). Mutants of a more severe allele, *eif2b5<sup>zc102/zc102</sup>*, harboring an early  
205 stop codon, exhibited growth deficits such as never developing a swim bladder, and were  
206 smaller in size compared to their wild type and heterozygous siblings (**Figure 2H**). This  
207 phenotype was also present in the *eif2b2<sup>sa17223/sa17223</sup>* allele (**Figure 2J**). Two alleles did not  
208 survive past two weeks of age: *eif2b5<sup>zc102/zc102</sup>* and *eif2b2<sup>sa17223/sa17223</sup>* (at 10dpf, *eif2b5<sup>+/+</sup>* WT  
209 n=12; *eif2b5<sup>zc102/+</sup>* heterozygous n=26; *eif2b5<sup>zc102/zc102</sup>* n=0. *eif2b2<sup>+/+</sup>* WT n=68; *eif2b2<sup>sa17223/+</sup>*

210 heterozygous n=118; *eif2b2*<sup>sa17223/sa17223</sup> n=2) (**Figure 2I,K**). Finally, since affected VWM  
211 patients often have progressive motor impairment, we analyzed the functional effects of *eif2b5*  
212 mutants on motor behavior. The *eif2b5*<sup>zc103</sup> homozygous mutants had reduced distance  
213 moved, movement time, and velocity when assayed at 5 dpf (**Figure 2L**).

214

### 215 ***eif2b* mutants had abnormal CNS development**

216 Because we observed that the *eif2b* mutants had early lethality and abnormal growth,  
217 we evaluated different CNS markers in early development. For most experiments we  
218 compared three *eif2b* alleles: two alleles in two different subunits with early lethality,  
219 *eif2b5*<sup>zc102</sup> and *eif2b2*<sup>sa17223</sup>; and a homozygous viable allele, *eif2b5*<sup>zc103</sup>. At 5 dpf, all three of  
220 these mutants showed an increase in cell death, quantified using terminal deoxynucleotidyl  
221 transferase dUTP nick end labeling (TUNEL) (*eif2b5*<sup>zc103</sup>: mean=129.1, S.D.=79.5, *eif2b5*<sup>+/+</sup>:  
222 mean=12.2, S.D.=9.8, p=0.001; *eif2b5*<sup>zc102</sup>: mean=163.7, S.D.=78.2 *eif2b5*<sup>+/+</sup>: mean=18.7,  
223 S.D.=10.6 p=2.03 x10<sup>-5</sup>; *eif2b2*<sup>sa17223</sup>: mean=202.8, S.D.=60.8; *eif2b2*<sup>+/+</sup>: mean=37.4,  
224 S.D.=25.2, p=0.0005) (**Figure 3A-E**). We also compared counts of cells expressing phospho-  
225 histone H3 (pH3), an indicator of cell proliferation. *eif2b5*<sup>zc103</sup> and *eif2b5*<sup>zc102</sup> mutants showed  
226 no change in pH3 cell counts at 5 dpf compared to controls, but showed a noticeable change in  
227 proliferation pattern, specifically the lack of proliferation in the outer perimeter of the eyes  
228 (arrow) and the cerebellum (arrowhead), but apparent increased proliferation in the ventricular  
229 region (asterisk) (*eif2b5*<sup>zc103</sup>: mean=247.2, S.D.=44.5, *eif2b5*<sup>+/+</sup>: mean=273.1, S.D.=43.8,  
230 p=0.206; *eif2b5*<sup>zc102</sup>: mean=243.3, S.D.=40.0, *eif2b5*<sup>+/+</sup>: mean=288.3, S.D.=32.0, p=0.0238)  
231 (**Figure 3F-H, J**). *eif2b2*<sup>sa17223</sup> mutants showed a decrease in pH3 cell counts at 5 dpf  
232 compared to controls as well as a change in proliferation pattern (*eif2b2*<sup>sa17223</sup>: mean=185.3,

233 S.D.=37.8: *EIF2B2*<sup>+/+</sup>: mean=271.6, S.D.=46.7, p=0.0004) (**Figure 3I, J**). In the spinal cord, we  
234 measured counts of oligodendrocyte precursor cells (OPCs), which give rise to myelin-  
235 producing oligodendroglia. We used the Tg(*olig2:dsRed*) line crossed into the *EIF2B5*<sup>zc103/zc103</sup>,  
236 *EIF2B5*<sup>zc102/zc102</sup> or *EIF2B2*<sup>sa17223/sa172233</sup> background (Kucenas et al., 2008). We observed no  
237 change in the number of OPC between two somites directly above the end of the yolk  
238 (*EIF2B5*<sup>zc103</sup>: mean=26.6, S.D.=7.55, *EIF2B5*<sup>+/+</sup>: mean=30.71, S.D.=5.88 p=0.278; *EIF2B5*<sup>zc102</sup>:  
239 mean=30.6, S.D.=11.0, *EIF2B5*<sup>+/+</sup>: mean=36.6, S.D.=9.63, p=0.514; *EIF2B2*<sup>sa17223</sup>: mean=35.8,  
240 S.D.=5.36, *EIF2B2*<sup>+/+</sup>: mean=39.2, S.D.=4.66, p=0.163) (**Figure 3K-O**). Lastly, we looked at  
241 apoptotic oligodendrocyte precursor cells in the brain by crossing the Tg(*olig2:dsRed*) line into  
242 the *EIF2B5*<sup>zc103/zc103</sup>, *EIF2B5*<sup>zc102/zc102</sup> or *EIF2B2*<sup>sa17223/sa172233</sup> background and staining with  
243 TUNEL. The *EIF2B5*<sup>zc102/zc102</sup> showed a large increase in the number of TUNEL+ OPC cells  
244 specifically in the hindbrain (*EIF2B5*<sup>zc102</sup>: mean=17.5, S.D.=3.02, *EIF2B5*<sup>+/+</sup>: mean=1, S.D.=1,  
245 p=0.00004). The *EIF2B5*<sup>zc103/zc103</sup> and the *EIF2B2*<sup>sa17223/sa172233</sup> alleles also showed a significant  
246 increase in the number of TUNEL+ OPC cells in the hindbrain, but less drastic of a change  
247 compared to the *EIF2B5*<sup>zc102/zc102</sup> allele (*EIF2B5*<sup>zc103</sup>: mean=3, S.D.=2.26, *EIF2B5*<sup>+/+</sup>: mean=0.7,  
248 S.D.= 1.06, p=0.0144; *EIF2B2*<sup>sa17223</sup>: mean=3.5, S.D.=1.05, *EIF2B2*<sup>+/+</sup>: mean=0.333, S.D.=0.577,  
249 p=0.002) (**Figure 3P-T**).

250

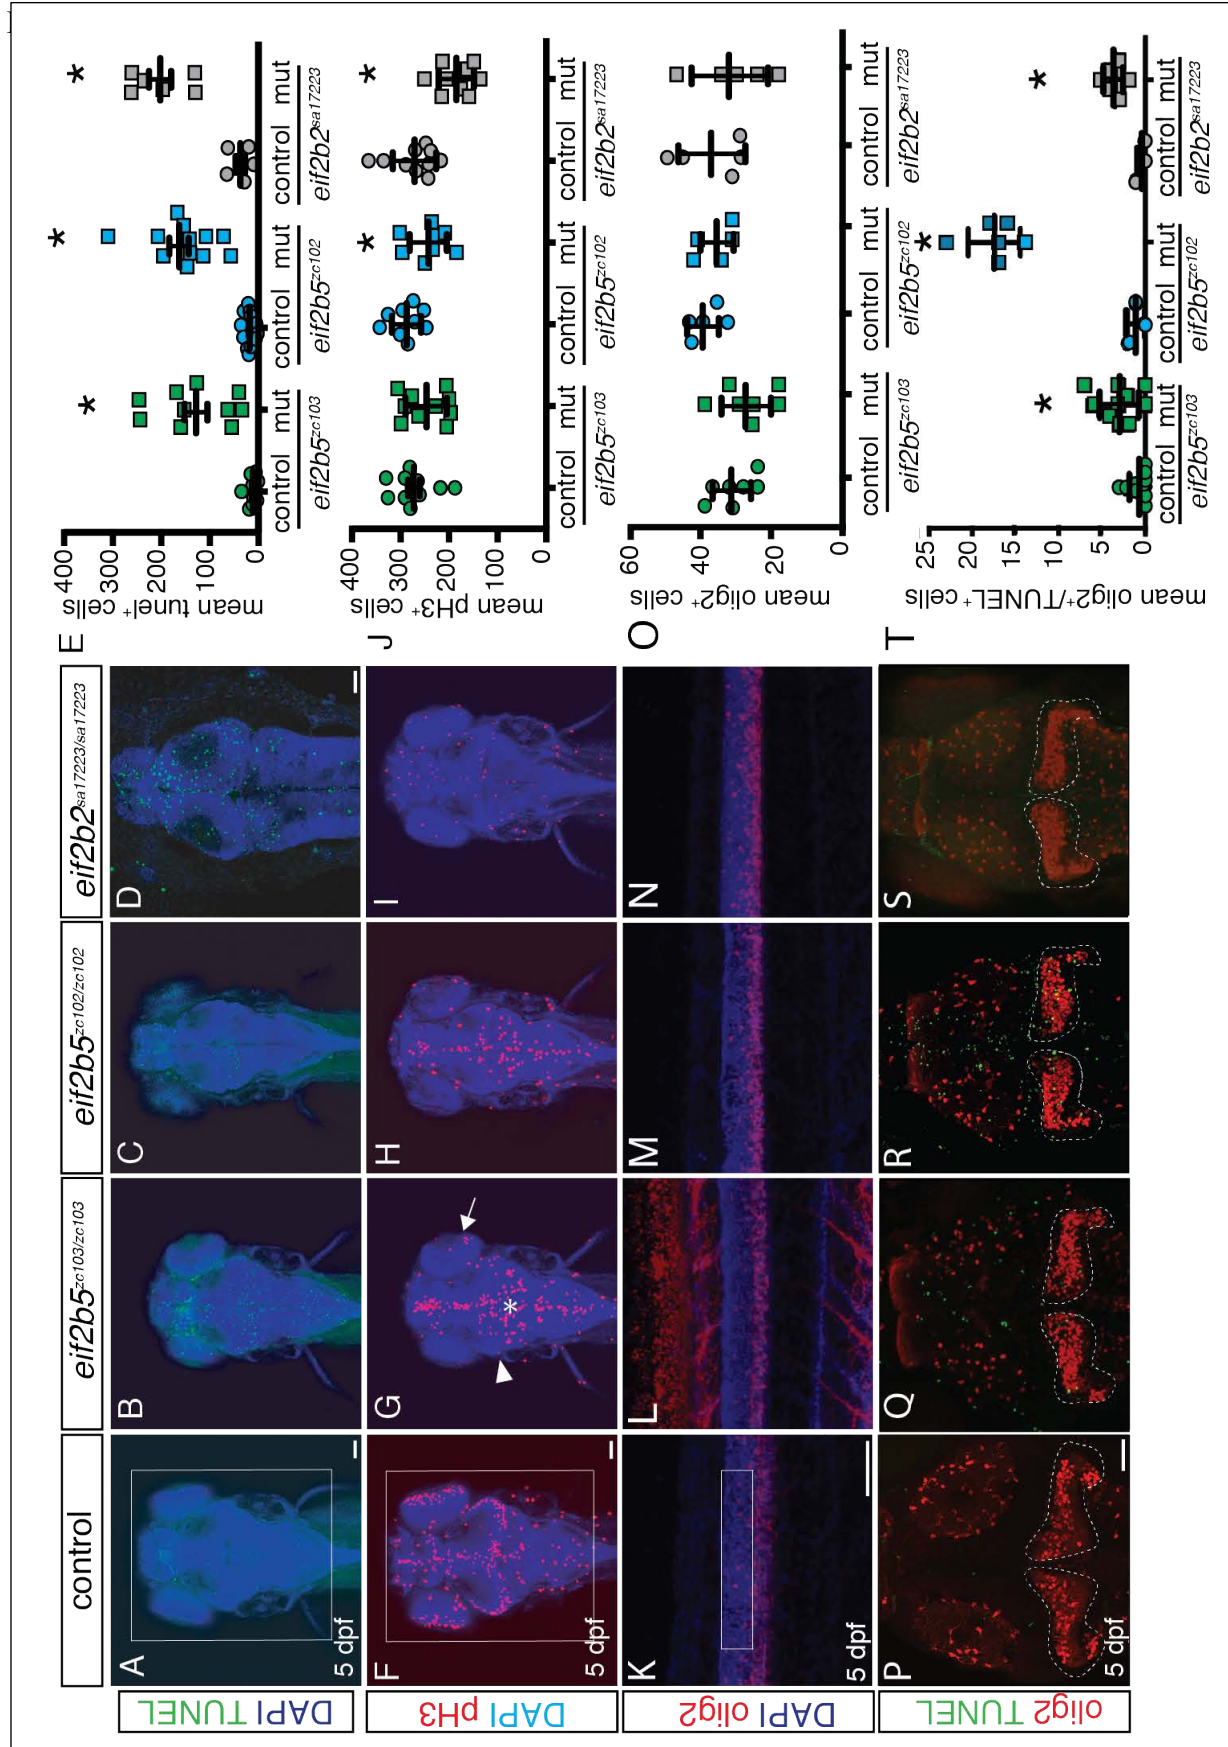

251 **Figure 3.** *eif2b* mutants demonstrate abnormal CNS development. Confocal images, z-stack  
252 maximal projections. A-I, dorsal views of the brain, rostral to the top, scale bar 50µm; K-N,  
253 lateral views of spinal cord, dorsal to the top, scale bar 50µm. P-S, dorsal views of brain, rostral  
254 to top, scale bar 50µm. \*  $p < 0.05$ . (A-D) TUNEL and DAPI staining shows increased apoptosis  
255 in homozygous mutant alleles compared to controls (wild-type and heterozygous siblings) in  
256 *eif2b5<sup>zc103/zc103</sup>* *eif2b5<sup>zc102/zc102</sup>* and *eif2b2<sup>sa17223/sa17223</sup>* mutants. (E) Quantification of mean  
257 TUNEL+ cell counts in *eif2b5<sup>zc103/zc103</sup>* *eif2b5<sup>zc102/zc102</sup>* and *eif2b2<sup>sa17223/sa17223</sup>* mutants compared  
258 to sibling controls. (F-I) Phospho-histone 3 and DAPI staining shows decreased cell proliferation  
259 in 5 dpf *eif2b2<sup>sa17223/sa17223</sup>* mutants compared to controls, while *eif2b5<sup>zc103/zc103</sup>* *eif2b5<sup>zc102/zc102</sup>*  
260 mutants show a change in proliferation pattern, specifically in the optic tectum. (J)  
261 Quantification of mean number pH3+ cells counts in *eif2b5<sup>zc103/zc103</sup>* *eif2b5<sup>zc102/zc102</sup>* and  
262 *eif2b2<sup>sa17223/sa17223</sup>* mutants compared to sibling controls. (K-N) Olig2dsRed and DAPI staining  
263 shows no change in oligodendrocyte proliferating cell counts in 5 dpf *eif2b5<sup>zc103/zc103</sup>*  
264 *eif2b5<sup>zc102/zc102</sup>* and *eif2b2<sup>sa17223/sa17223</sup>* mutants compared to controls. (O) Quantification of mean  
265 number OPC+ cell counts in *eif2b5<sup>zc103/zc103</sup>* *eif2b5<sup>zc102/zc102</sup>* and *eif2b2<sup>sa17223/sa17223</sup>* mutants  
266 compared to sibling controls.  
267 **Figure 3- Source Data 1-4:** Quantification of TUNEL, pH3, olig2, and olig2/TUNEL results.  
268

### 269 **Zebrafish adult *eif2b5<sup>zc103/zc103</sup>* mutants show myelin defects**

270 VWM patients have a loss of white matter and abnormal white matter signal quality on  
271 MRI (Leegwater et al., 2003; van der Knaap et al., 2006). We used transmission electron  
272 microscopy (TEM) to measure myelin content in the adult *eif2b5<sup>zc103/zc103</sup>* mutants compared to  
273 age-matched controls. The adult mutants showed a significant decrease in the thickness of the  
274 myelin sheath as measured by the G-ratio, the perimeter of the axon to the perimeter of the  
275 myelin sheath (*eif2b5<sup>zc103</sup>*: mean=0.690, S.D.=0.076, *eif2b5<sup>+/+</sup>*: mean=0.593, S.D.= 0.085,  
276  $p=2.18E-22$ ) (**Figure 4A-E**). We also performed Black Gold II staining to compare  
277 myelination patterns in the CNS. The adult mutants showed a disorganized pattern of  
278 myelinated axons in the optic tectum compared to age matched wild type adult controls  
279 (**Figure 4F, G**).

280 We performed magnetic resonance imaging (MRI) of adult *eif2b5* mutants, and found a  
281 decrease in overall brain size in the adult *eif2b5<sup>zc103/zc103</sup>* mutants compared to adult wild type  
282 controls using the skull as a normalization factor to account for the decrease in overall size of

283 the mutants (**Figure 4H-J; Source- Supplemental Figure 1**). These images showed a decrease  
284 in overall brain volume of the *EIF2B5<sup>zc103/zc103</sup>* mutants as measured by length, width and height  
285 of the brains compared to age matched controls (*EIF2B5<sup>zc103/zc103</sup>* normalized length:  
286 mean=0.933; S.D.=0.041; *EIF2B5<sup>+/+</sup>* normalized length: mean=1.11, S.D.=0.091, p=0.001;  
287 *EIF2B5<sup>zc103/zc103</sup>* normalized width: mean=0.836; S.D.=0.034; *EIF2B5<sup>+/+</sup>* normalized width:  
288 mean=0.958, S.D.=0.023, p=0.00002; *EIF2B5<sup>zc103/zc103</sup>* normalized height: mean=0.551;  
289 S.D.=0.018; *EIF2B5<sup>+/+</sup>* normalized height: mean=0.629, S.D.=0.035, p=0.0006) (**Source-**  
290 **Supplemental Figure 1**). We also found a change in the intensity between the grey of the optic  
291 tectum and the white matter of the periventricular grey zone in the T2 MRI images from the  
292 rhombencephalic ventricle (RV) at the end of the midbrain moving rostrally (*EIF2B5<sup>zc103/zc103</sup>*  
293 normalized intensity: mean=0.849; S.D.=0.108; *EIF2B5<sup>+/+</sup>* normalized length: mean=0.743,  
294 S.D.=0.091, p=0.0005) (**Figure 4I**).

295

296 **Figure 4.** Adult *eif2b5<sup>zc103/zc103</sup>* mutants show myelin defects. A-C Transmission electron  
 297 microscopy (TEM) of adult *eif2b5<sup>zc103/zc103</sup>* optic nerve compared to *eif2b5<sup>+/+</sup>* adults. Scale bar 2  
 298  $\mu$ m. (A) *eif2b5<sup>+/+</sup>* adult TEM image. (B) *eif2b5<sup>zc103/zc103</sup>* adult TEM image. (C-E). Comparison of  
 299 ratio between axon perimeter and myelin sheath perimeter, G-ratio, between *eif2b5<sup>zc103/zc103</sup>* and  
 300 *eif2b5<sup>+/+</sup>*; axon diameter and myelin thickness quantification shown. (F-G) Black Gold stain of  
 301 adult *eif2b5<sup>zc103/zc103</sup>* optic tectum compared to *eif2b5<sup>+/+</sup>* adults. Scale bar 5  $\mu$ m. (F) *eif2b5<sup>+/+</sup>*  
 302 adult Black Gold stained image. (G) *eif2b5<sup>zc103/zc103</sup>* adult Black Gold stained image. (H-J)  
 303 Magnetic Resonance Image (MRI) of adult *eif2b5<sup>zc103/zc103</sup>* compared to *eif2b5<sup>+/+</sup>*. Scale bar 2  
 304 mm. Slice scheme of MRI images from the rhombencephalic ventricle (RV) at the end of the  
 305 midbrain moving rostrally. (G) *eif2b5<sup>+/+</sup>* adult T2 MRI image slice 1. (H) *eif2b5<sup>zc103/zc103</sup>* adult  
 306 T2 MRI of slice 1. (I) T2 intensity analysis. The normalized change in intensity from the  
 307 grey matter region of the optic tectum to the white matter region of the periventricular grey zone  
 308 of the optic tectum, indicated by red boxes.

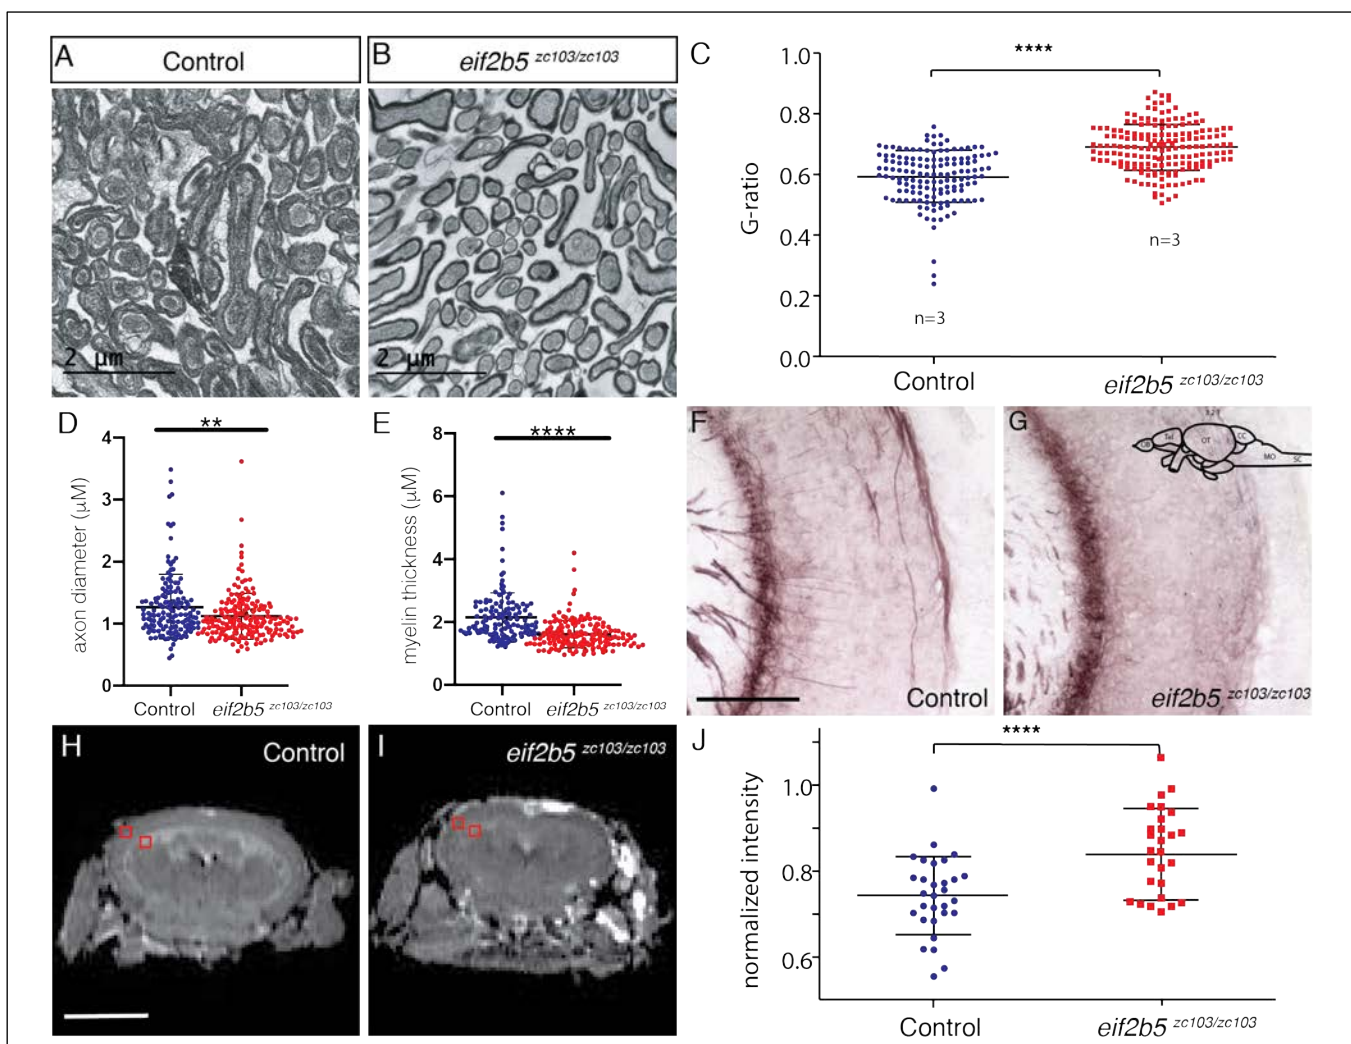

309 **Figure 4- Source Data 1:** Quantification of TEM results.

310 **Figure 4- Source Data – Supplemental Figure 1.** MRI images of adult wild-type control  
 311 siblings and *eif2b5<sup>zc103/zc103</sup>* fish, showing decreased head and body size.  
 312



### 313 **Human *EIF2B* genes rescue zebrafish *eif2b* mutant lethality and CNS apoptosis**

314 Although the human and zebrafish *eif2b* subunit genes show significant conservation in  
315 protein sequence, an important question for modeling VWM is to demonstrate functional  
316 conservation. Zebrafish and human *eif2b2* ortholog amino acids are highly conserved, and  
317 both orthologs have the same number of exons (**Figure 5A-C**). To test functional conservation,  
318 we created transgenic animals ubiquitously expressing human *EIF2B2*. We created a Tol2  
319 transposable vector in which the human *EIF2B2* gene and enhanced green fluorescent protein  
320 (eGFP) was expressed under control of the ubiquitously-expressing promoter  $\beta$ -actin (**Figure**  
321 **5D**). We mated *eif2b2*<sup>sa177223/+</sup> heterozygous adults, and injected their embryos at the one cell  
322 stage with the human *EIF2B2* vector to introduce the transgene (Tg) into the germline.  
323 Embryos were screened at 3 dpf, and those positive for GFP were grown up to adults and  
324 genotyped (**Figure 5G**). The transgenic mutant *eif2b2*<sup>sa177223/sa177223</sup>;Tg( $\beta$ -actin:*EIF2B2-2A-*  
325 *EGFP*) larva developed a swim bladder and the growth deficits were rescued (**Figure 5F**). As  
326 adults, the GFP positive *eif2b2*<sup>sa177223/+</sup>;Tg( $\beta$ -actin:*EIF2B2-2A-EGFP*) were crossed with non-  
327 transgenic *eif2b2*<sup>sa177223/+</sup>. The offspring from this cross were genotyped and compared to a  
328 non-transgenic *eif2b2*<sup>sa177223/+</sup> in-cross. Typically, *eif2b2*<sup>sa177223/sa177223</sup> have early lethality by  
329 10 dpf. In contrast the transgenic homozygous mutant *eif2b2*<sup>sa177223/sa177223</sup>;Tg( $\beta$ -  
330 *actin:EIF2B2-2A-EGFP*) animals showed 21% survival at 10 dpf (e.g. Mendelian ratios)  
331 (**Figure 5E**). This increase in transgenic homozygous mutant survival continued to adulthood,  
332 and the mutants were able to mate and were fertile. Further, the *eif2b2*<sup>sa177223/sa177223</sup> increase in  
333 apoptosis (**Figure 5H-I, L**) was rescued and apoptosis in the *eif2b2*<sup>sa177223/sa177223</sup>;Tg( $\beta$ -  
334 *actin:EIF2B2-2A-EGFP*) was significantly reduced (TUNEL counts *eif2b2*<sup>sa177223/sa177223</sup>

335 transgenic: mean=31.5, S.D.=12.9; *elf2b2*<sup>sa17223/sa17223</sup> non-transgenic: mean=84.4, S.D.=27.63,  
336 p=1.89E-05) (**Figure 5J-L**).

337 **Figure 5.**

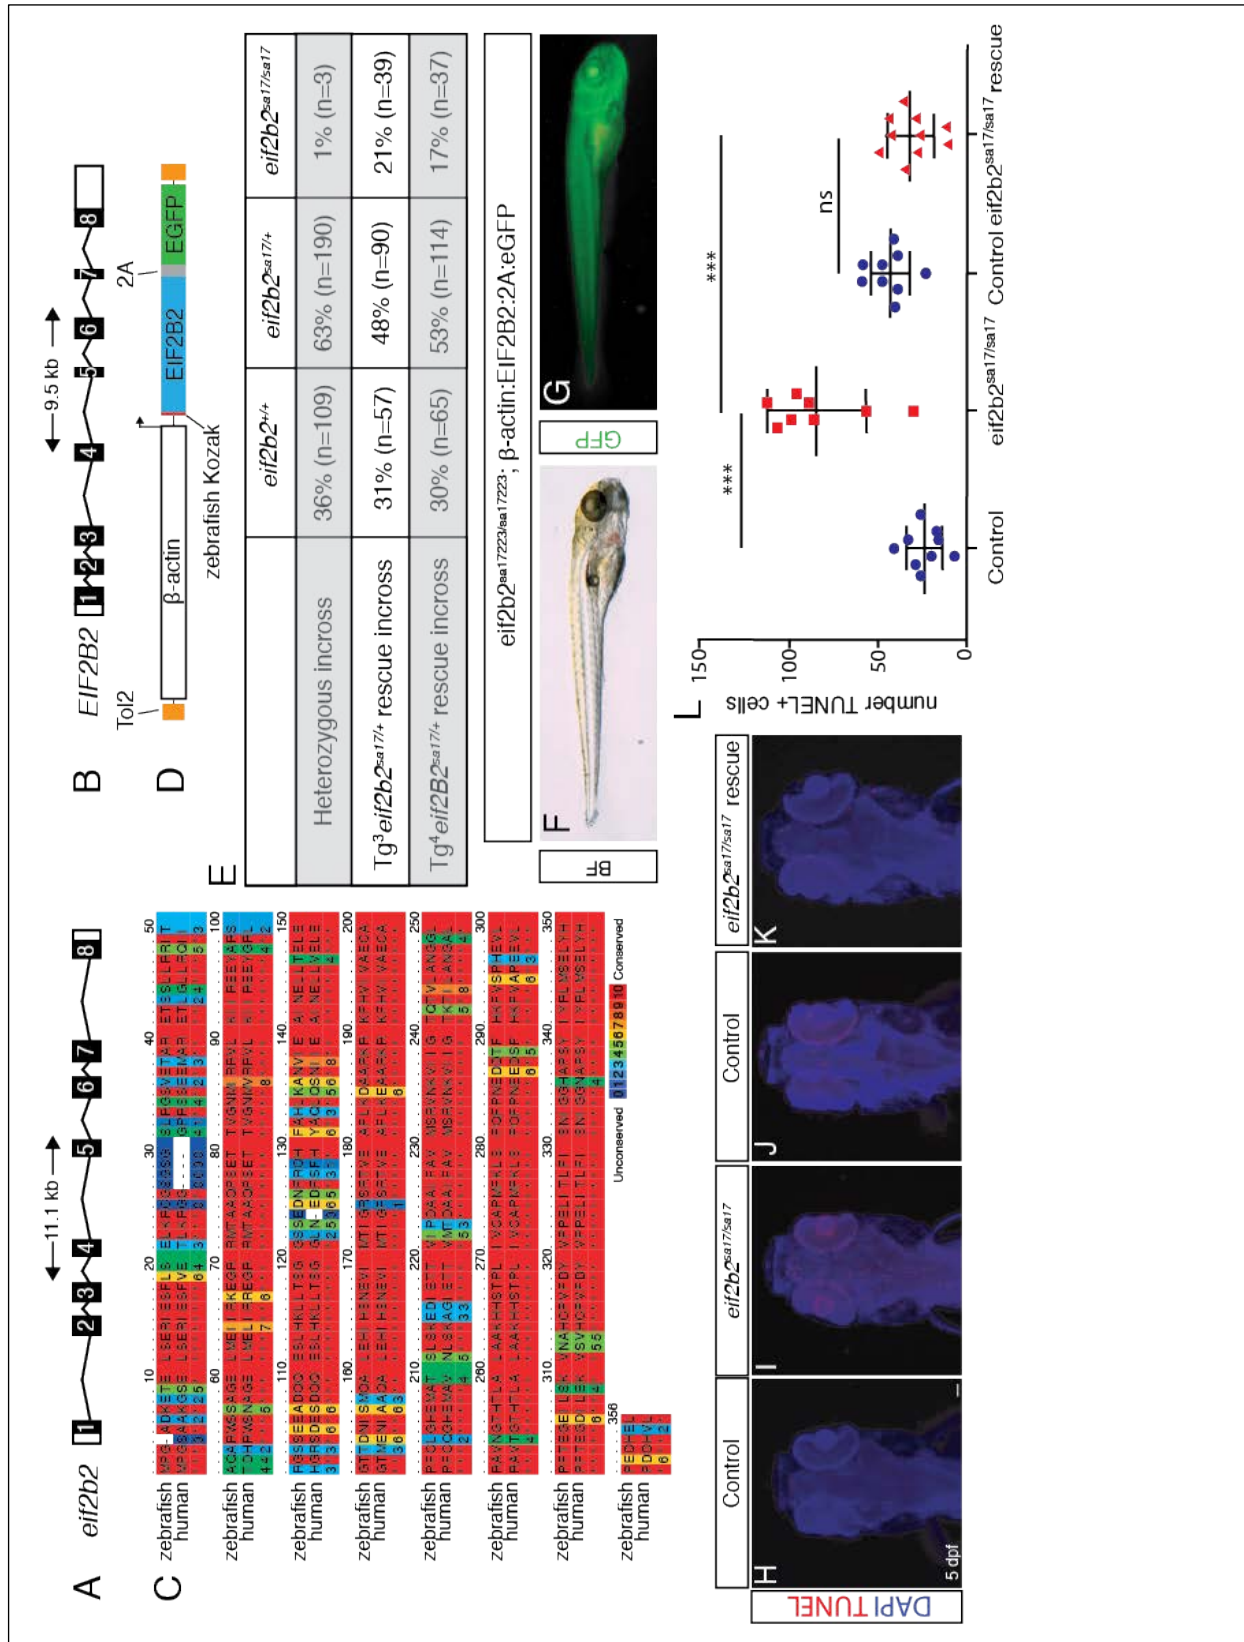

338 **Figure 5.** Human *EIF2B2* gene rescues zebrafish *eif2b2*<sup>sa17223/sa17223</sup> mutants. (A) 11.1 kb  
339 zebrafish *eif2b2* gene structure. (B) 9.5 kb human *EIF2B2* gene structure. (C) Conservation of  
340 amino acid sequence between zebrafish *eif2b2* and human *EIF2B2*. (D) Schematic of rescue  
341 construct containing Tol2,  $\beta$ -actin, human *EIF2B2*, and eGFP. (E) Genotype results (at adult  
342 age), of an *eif2b2*<sup>sa17223/+</sup> heterozygous incross, and an *eif2b2*<sup>sa17223/+</sup> heterozygous zebrafish  
343 crossed with two different transgenic alleles (#3 and #4): *eif2b2*<sup>sa17223/+</sup>;Tg<sup>3</sup>( $\beta$ -  
344 *actin:EIF2B2:2A:eGFP*) or *eif2b2*<sup>sa17223/+</sup>;Tg<sup>4</sup>( $\beta$ -*actin:EIF2B2:2A:eGFP*) heterozygous  
345 zebrafish. (F) Bright-field image of *eif2b2*<sup>sa17223/sa17223</sup>;  $\beta$ -*actin:EIF2B2:2A:eGFP* mutant fish  
346 containing a swim bladder and regular-sized head. (G) Immunofluorescent image of expression  
347 of GFP in *eif2b2*<sup>sa17223/sa17223</sup>;  $\beta$ -*actin:EIF2B2:2A:eGFP* mutant fish. (H-K) TUNEL and DAPI  
348 antibody staining of wild-type control; *eif2b2*<sup>sa17223/sa17223</sup> mutant; *eif2b2*<sup>+/+</sup>;  $\beta$ -  
349 *actin:EIF2B2:2A:eGFP* wild-type control; and *eif2b2*<sup>sa17223/sa17223</sup>;  $\beta$ -*actin:EIF2B2:2A:eGFP*  
350 mutant. (L) Quantification of TUNEL+ cells.

351 **Figure 5- Source Data 1:** Quantification of TUNEL results.

352

353

354 ***eif2b* mutants express a truncated *eif2b5* transcript that causes ISR activation and defects**  
355 **in behavior**

356 Work studying cancer cell lines has shown that during periods of hypoxia, ISR  
357 activation leads to retention of intron 12 in *EIF2B5* by interfering with the exon 12 splice site  
358 (Brady et al., 2017) (**Figure 6A**). This retained intron contains a premature stop codon,  
359 resulting in a truncated 65 kDa EIF2B5 protein, and rendering the eIF2B complex unable to  
360 initiate translation. To test whether the ISR in VWM could similarly affect *eif2b5* splicing, we  
361 tested intron 12 retention. We found an increase in retention of intron 12 associated with  
362 truncated *eif2b5* in *eif2b* mutant alleles (*eif2b5: zc102* and *zc103*; *eif2b2: sa17223*) (**Figure**  
363 **6B**); and which was also observed in peripheral lymphocytes from a human VWM patient  
364 (**Figure 6C**).

365 To test whether the 65kDa EIF2B5 has a dominant-negative effect, we expressed a  
366 truncated *eif2b5* in wild-type embryos, and found impairment of motor behavior (**Figure 6D**).  
367 Since in VWM chronic activation of the ISR is believed to contribute to pathophysiology, we

368 examined ISR activation in *eif2b5* mutants by analyzing the expression of *atf4*, a key regulator  
369 in ISR. qRT-PCR analysis showed *atf4* expression was increased in *eif2b5* mutants (**Figure**  
370 **6E**), indicating that at baseline in the zebrafish mutants there was ISR activation. Next, we

371 also examined ISR activation in wild-type embryos expressing truncated *eif2b5*. qRT-PCR  
 372 showed that ISR markers including *atf4*, *chop II*, *bip* and *perk*, were up-regulated (**Figure 6F**),  
 373 indicating that truncated *eif2b5* was sufficient to activate ISR.

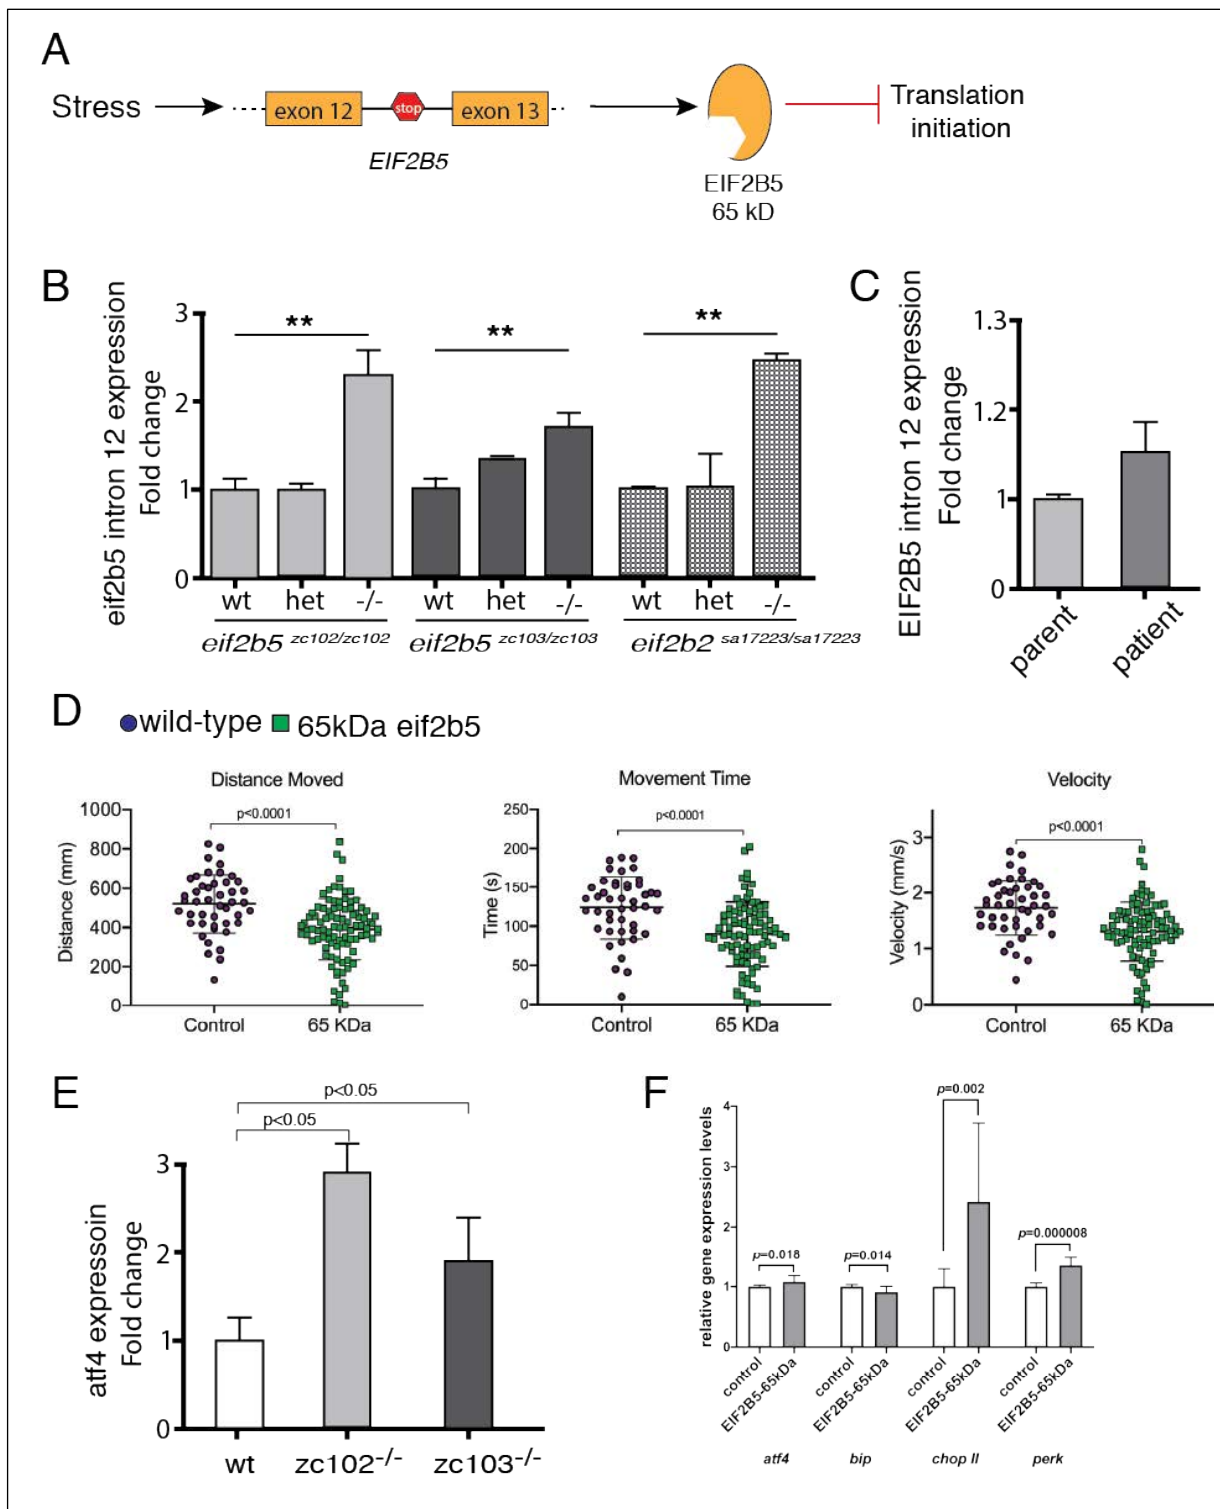

374 **Figure 6.**

375 **Figure 6.** Zebrafish *eif2b5* mutant alleles show intron retention, activated ISR, and role of  
376 truncated Eif2b5 in worsening phenotype. (A) Schematic showing integrated stress response  
377 activated intron 12 retention of *eif2b5* resulting in premature stop codon and truncated form of  
378 EIF2B5. (B) Fold change of *eif2b5* intron 12 expression with qRT-PCR in *eif2b5<sup>zc103/zc103</sup>*,  
379 *eif2b5<sup>zc102/zc102</sup>*, and *eif2b2<sup>sa17223/sa17223</sup>* mutants relative to controls. (C) qRT-PCR for intron 12  
380 expression in a VWM patient and their control unaffected father. (D) Control-injected larvae,  
381 compared to those injected with truncated *eif2b5* construct, shows impaired swimming  
382 behavior; distance moved, time spent moving, and velocity, at 5 dpf. (E) qRT-PCR for *atf4*  
383 ISR transcript shows increased expression in *eif2b5* mutants *zc102* and *zc103*. (F) qRT-PCR  
384 for ISR transcripts (*atf4*, *bip*, *chop II*, and *perk*) shows increased expression following  
385 injection of truncated *eif2b5* construct.

386 **Figure 6- Source data File 1:** qRT-PCR for intron 12 expression changes (*eif2b5*, zebrafish).

387 **Figure 6- Source data File 2:** qRT-PCR for intron 12 expression changes (*eif2b2*, zebrafish).

388 **Figure 6 – Source data File 3:** qRT-PCR for intron 12 expression changes (human).

389 **Figure 6- Source data File 4:** Behavior data for truncated *eif2b5* effects.

390 **Figure 6- Source data File 5:** qRT-PCR for *atf4* expression.

391 **Figure 6- Source data File 6:** qRT-PCR for ISR transcripts expression changes following  
392 injection with truncated *eif2b5*.

393

394 **Discussion**

395 We have generated and characterized a zebrafish model for VWM by analysis of alleles  
396 in *eif2b1*, 2, 4; and an allelic series in *eif2b5*. The zebrafish *eif2b* mutants phenocopy important  
397 aspects of human VWM, including increased morbidity and mortality, altered myelination, and  
398 impaired motor behavior. Further, using rescue with expression of the human *EIF2B2* cDNA, we  
399 demonstrate functional conservation in the zebrafish *eif2b2* mutant. Importantly, our data  
400 reveals a novel potential mechanism of VWM pathophysiology: ISR activation in the *eif2b*  
401 mutants causes abnormal splicing and generation of a truncated *eif2b5* transcript, which is  
402 capable of further activating the ISR and impairing motor behavior. Thus, in healthy individuals,  
403 stress would activate the ISR but would appropriately be terminated through down-regulation of  
404 the ISR by dephosphorylation of eIF2 (Pakos-Zebrucka et al., 2016). But in VWM patients,  
405 stress would activate the ISR, and would also lead to expression of truncated *EIF2B5* expression;

406 which would cause a feed-forward mechanism of further and chronic ISR activation (**Figure 7**).

407 This chronic activation of the ISR is observed in human autopsy samples and in a mouse VWM

408 model (van der Voorn et al., 2005; van Kollenburg et al., 2006; Wong et al., 2019).

409



410 **Figure 7.** Feed-forward effect of truncated EIF2B5. A-C) Under normal conditions, stress leads  
 411 to activation of the ISR, which is terminated by dephosphorylation of eIF2a by PP1 (protein

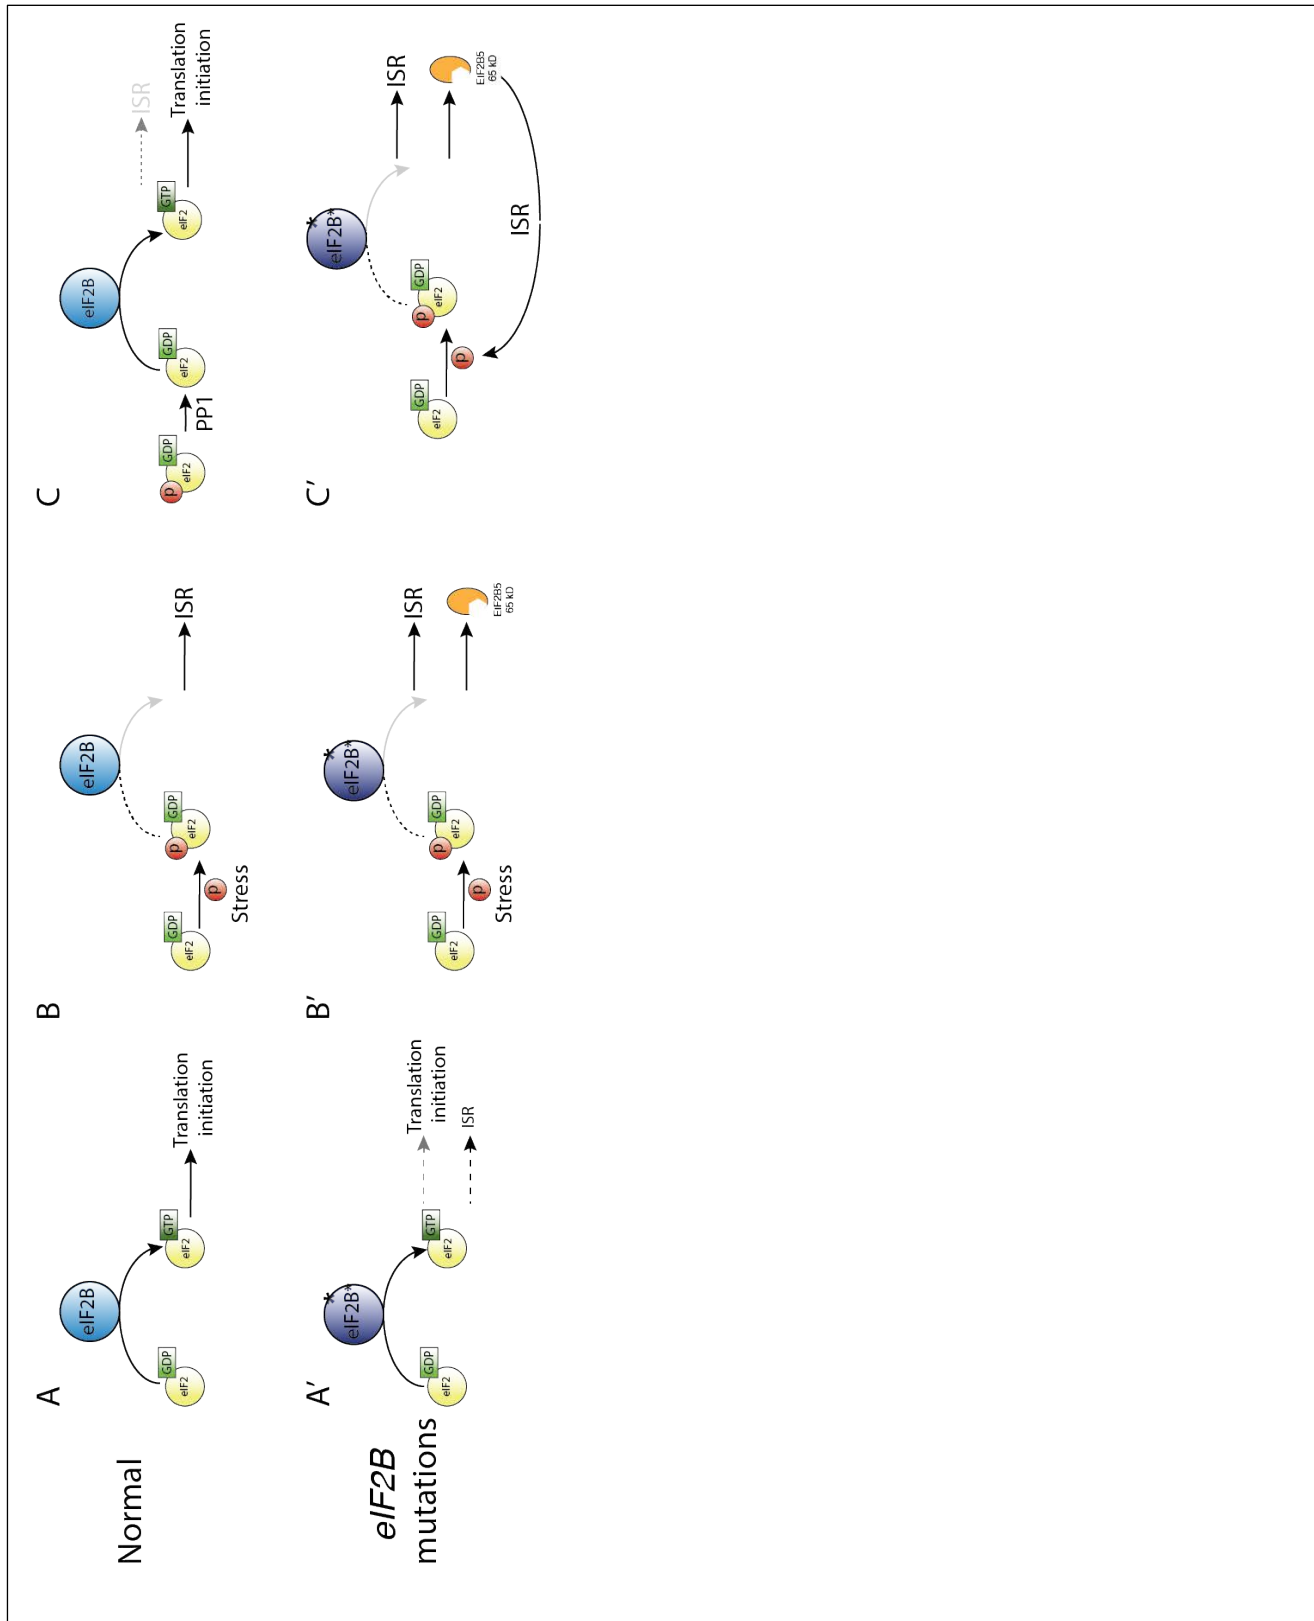

412 phosphatase 1 complex) and resumption of normal cap-dependent translation. A'-C') In the  
413 presence of *eif2b* subunit mutations in VWM, normal translation is impaired, and there is  
414 activation of the ISR above baseline (A'). In response to stress, there is ISR activation and  
415 expression of truncated EIF2B5, which leads to chronic activation of the ISR and an inability to  
416 terminate the ISR.  
417

418         The eIF2B complex is comprised of five subunits that together act as the guanine  
419 nucleotide exchange factor for eIF2, governing the rate of global protein synthesis and cap-  
420 dependent translation initiation. VWM can be caused by autosomal recessive mutations in any of  
421 the five subunits of eIF2B. Zebrafish show expression of the *eif2b* genes at 24 hpf through 7 dpf  
422 including in the CNS. Mutations in the most commonly affected patient subunits, *eif2b2* and  
423 *eif2b5*, showed growth deficits and decreased survival, mimicking clinical features of VWM.  
424 Since we found that human *EIF2B2* expression in zebrafish can rescue the increased apoptosis  
425 and early lethality phenotype of *eif2b2*<sup>sa17223</sup> homozygous mutants, our work suggests  
426 conservation of *eif2b* expression and function.

427         Mutations in the zebrafish eIF2B complex were associated with multiple defects in  
428 development of the CNS. In the 5 dpf homozygous mutants of *eif2b2*<sup>sa17223</sup>, *eif2b5*<sup>zc102</sup> and  
429 *eif2b5*<sup>zc103</sup> alleles there was an increase in apoptosis in the CNS. We also observed altered  
430 patterns of cell proliferation pattern in the CNS, and a decrease in overall CNS proliferation in  
431 the *eif2b2*<sup>sa17223</sup> mutants. Although there was no change in total oligodendrocyte precursor cell  
432 numbers in the spinal cord or brain, we found an increase in the number of oligodendrocyte  
433 precursor cells undergoing apoptosis in the hindbrain. We also observed impaired myelination,  
434 marked by a decrease in thickness of the myelin sheath, abnormal patterning of myelinated axon  
435 tracts in the optic tectum, and abnormal intensity of white matter regions on MRI.

436         Since a hallmark of VWM is that disease progression can be precipitated by stressors, we  
437 tested the ISR and the response to stress in the *eif2b* mutants. We noted that while stress of wild

438 type zebrafish caused motor deficits, stress in the mutant *eif2b* zebrafish (including heat shock,  
439 hypoxia, or thapsigargin) did not worsen further worsen their already impaired motor behavior  
440 (data not shown). This suggests that the *eif2b* mutant zebrafish are already “maximally” stressed  
441 at baseline, consistent with the observed activation of the ISR at baseline, and the finding of  
442 increased intron 12 retention. ISR induces expression of transcription factors including ATF4  
443 (Harding et al., 2000; Watatani et al., 2008). ATF4 and other components of the ISR trigger a  
444 stress-induced transcriptional program that promotes cell survival during mild or acute  
445 conditions, but which causes pathological changes under severe or chronic insults (Pakos-  
446 Zebrucka et al., 2016).

447 A poorly understood aspect of VWM is why a minor stressor can precipitate significant  
448 white matter loss and neurological deterioration. Our work suggests that this is caused by a feed-  
449 forward effect of chronic ISR that cannot be terminated. This occurs by alternative splicing and  
450 retention of intron 12 in *eIF2B5* leading to a premature stop codon and expression of a truncated  
451 eIF2B5. This was first observed in cancer cell lines in response to hypoxia (Brady et al., 2017).  
452 We showed that truncated *eif2b5* is expressed in VWM mutants, and that expression of the  
453 truncated *eif2b5* impairs motor function, and itself leads to further activation of the ISR.

454 Major advances in the past several years have shown that a small molecule stabilizing the  
455 decameric eIF2B complex (ISRIB - ISR inhibitor) can boost the GEF activity of wild-type and  
456 VWM mutant eIF2B complexes (Tsai et al., 2018; Wong et al., 2018) and can inhibit the ISR in  
457 mice bearing an *Eif2b5*<sup>R132H/R132H</sup> VWM mutation (Wong et al., 2019). However, it is not clear  
458 whether ISRIB or other drugs targeting eIF2B complex stability will be sufficient to prevent  
459 stress-induced ISR chronic, feed-forward activation. Therapies for VWM may need a

460 combinatorial approach incorporating eIF2B stabilization at baseline; and prevention of stress-  
461 induced truncated eIF2B5 expression.

462

463

## 464 **Methods**

465

### 466 **Ethics Statement**

467 Zebrafish experiments were performed in strict accordance of guidelines from the  
468 University of Utah Institutional Animal Care and Use Committee (IACUC), regulated under  
469 federal law (the Animal Welfare Act and Public Health Services Regulation Act) by the U.S.  
470 Department of Agriculture (USDA) and the Office of Laboratory Animal Welfare at the NIH,  
471 and accredited by the Association for Assessment and Accreditation of Laboratory Care  
472 International (AAALAC).

473 Human subjects-related aspects of the study were approved by the Institutional Review  
474 Board of the University of Utah and the Privacy Board of Intermountain Healthcare.

### 475 **Fish stocks and embryo raising**

476 Adult fish were bred according to standard methods. Embryos were raised at 28.5°C in  
477 E3 embryo medium and staged by time and morphology. For *in situ* staining and  
478 immunohistochemistry, embryos were fixed in 4% paraformaldehyde (PFA) in 1xPBS overnight  
479 (O/N) at 4°C, washed briefly in 1xPBS with 0.1% Tween-20, serially dehydrated, and stored in  
480 100% MeOH at -20°C until use. Transgenic fish lines and alleles used in this paper were the  
481 following: Tg(*olig2:dsRed*)<sup>vu19</sup> (Kucenas et al., 2008) and Tg(*sox10:mRFP*) (Park et al., 2005).

### 482 ***eif2B* Sequence Analysis**

483 Human and zebrafish *eif2b1*, *eif2b2*, *eif2b3*, *eif2b4* and *eif2b5* subunit genes amino acid  
484 sequences were compared using Clustal Omega (<https://www.ebi.ac.uk/Tools/msa/clustalo/>)  
485 (Sievers et al., 2011) and aligned using PRALINE (<http://www.ibi.vu.nl/programs/pralinewww/>)  
486 (Simossis and Heringa, 2005); phylogenetic tree analysis was performed with PhyloDendron  
487 (<http://iubio.bio.indiana.edu/treeapp/treeprint-form.html>).

#### 488 **Zebrafish *eif2b* mutant lines obtained from Sanger Zebrafish Mutation Project**

489 We obtained the *eif2b1*<sup>sa12357</sup>, *eif2b2*<sup>sa17223</sup>, and *eif2b4*<sup>sa17367</sup> alleles generated by the  
490 Sanger Zebrafish Mutation Project per our request and established these lines as viable stock at  
491 our facility. The *eif2b1*<sup>sa12357</sup> allele results in a T>A nonsense mutation resulting in an early stop  
492 in exon 8. The *eif2b2*<sup>sa17223</sup> and *eif2b4*<sup>sa17367</sup> alleles have mutations in an essential splice site  
493 predicted to interrupt splicing from exon 5 to 6 of *eif2b2* by a G>A mutation at the end of exon 5  
494 (744 nt), and from exon 12 to 13 in *eif2b4* by a G>A mutation at the end of exon 12 (1404 nt).

#### 495 ***eif2b5* CRISPR sgRNA construction and injection**

496 Targeting the *D. rerio eif2b5* gene (Ensembl Zv10: ENSDART00000110416.4) for  
497 CRISPR mutagenesis was performed by the University of Utah Mutation Generation and  
498 Detection Core (<http://cores.utah.edu/mutation-generation-detection/>). We designed sgRNA  
499 target sites by looking for sequences corresponding to N<sub>18</sub>GG on the sense or antisense strand of  
500 the DNA using the CRISPR design program at <http://crispr.mit.edu>. Off-target effects were  
501 checked through the use of NIH BLAST tool applied to the zebrafish genome (zv10). Off-target  
502 sequences that had significant matches of the final 23 nt of the target and NGG PAM sequence  
503 were discarded.

504 sgRNAs targeting exon 1 (*eif2b5-ex1*) were transcribed using DraI-digested gRNA  
505 expression vectors as templates, and the HiScribe T7 RNA Synthesis kit (New England BioLabs)  
506 followed by RNA purification with Micro Bio-spin 6 columns (BioRad).

507 To maximize mutagenesis and minimize lethality, an *eif2b5-ex1* sgRNA dose curve was  
508 performed. A mix of *eif2b5-ex1* sgRNA (between 250 pg-600 pg) and Cas9 protein (600 pg,  
509 Integrated DNA Technologies) were injected into one cell stage embryos, as previously  
510 described. CRISPR efficiency was evaluated on individual 24 hpf injected embryos after DNA  
511 extraction, PCR amplification of the target locus, and HRMA analysis. An *eif2b5-ex1* sgRNA  
512 dose of 450 pg resulted in >90% mutagenesis in 24 hpf embryos, assayed by HRMA, with no  
513 difference in survivability compared to uninjected controls. Embryos used for injection were  
514 derived from wild-type AB parents, previously confirmed at the *eif2b5* locus to have exact  
515 homology for the sgRNA sequence.

#### 516 **HRMA PCR**

517 DNA was extracted from embryos (24 hpf-72 hpf), or fin clips from adults, into 50mM  
518 NaOH, and incubated at 95°C for 20 min, followed by neutralization with 1M Tris pH 8.0 (1:10  
519 by volume) as previously described (Xing et al., 2014). Oligonucleotides were designed using  
520 Primer3 (<https://www.ncbi.nlm.nih.gov/tools/primer-blast/>) to give 60-100 nucleotide products  
521 spanning the CRISPR cleavage site, and tested *in silico* using uMELT  
522 (<https://www.dna.utah.edu/umelt/umelt.html>) to determine PCR products with optimal  
523 thermodynamic profiles. PCR was performed using LightScanner Master Mix System (BioFire)  
524 in 10 µl reactions as previously described (Xing et al., 2014). Thermal melt profiles were  
525 collected on a LightScanner (Idaho Technology) (65-98 C, hold 62° C) and analyzed with  
526 LightScanner Software.

527 Genotyping was performed by PCR and high-resolution melt analysis (HRMA), using the  
528 LightScanner Master Mix system. For *eif2b5* alleles with mutations in exon 1, we used the  
529 following primers and conditions: (*eif2b5* forward primer) 5'-  
530 AAGCCGGTGTCGGATAAAGAT-3' and (*eif2b5* reverse primer) 5'-  
531 AAACCTGCGGTTGAAACTGTC-3'; 95°C for 2 min, followed by 29 cycles of 94°C for 30 s,  
532 and 60°C for 30 s, followed by a final denaturation and annealing step of 95°C for 30 s, and 25°C  
533 for 30 s. For *eif2b2*<sup>sa17223</sup> genotyping we did PCR with the following primers and conditions:  
534 (*eif2b2* forward primer) 5'- TAATGTCACGAGTCAATAAG-3' and (*eif2b2* reverse primer) 5'-  
535 AGGATTAATCTTTTATTTCA-3'; 95°C for 2 min, followed by 29 cycles of 94°C for 30 s, and  
536 60°C for 30 s, followed by a final denaturation and annealing step of 95°C for 30 s, and 25°C for  
537 30 s. For *eif2b4*<sup>sa17367</sup> genotyping we did PCR with the following primers and conditions (*eif2b4*  
538 forward primer) 5'-TTGAGCATCAAAAGGGTTATTG -3' and (*eif2b4* reverse primer) 5'-  
539 CGGACTCTTTTGTATCCAATG -3'; 95°C for 2 min, followed by 29 cycles of 94°C for 30 s,  
540 and 55°C for 30 s, followed by a final denaturation and annealing step of 95°C for 30 s, and 25°C  
541 for 30 s. All PCR was run in an optically transparent plate with 25 µl mineral oil overlay. We  
542 then performed HRMA to differentiate the *eif2b* melt-curves from their corresponding controls.

543 For *eif2b1*<sup>sa12357</sup> genotyping, HRMA analysis was not able to reliably identify mutant  
544 versus wild-type alleles. We therefore used the restriction endonuclease sequence Hpy188I  
545 (taTCAGAtg) present in the wild-type allele of *eif2b1*, but not in the *eif2b1*<sup>sa12357</sup> mutant allele  
546 (taACAGAtg) to create a restriction fragment length polymorphism (RFLP) for genotyping. We  
547 first performed PCR of the target locus (667bp) in a 10 µl reaction, with the following primers  
548 and conditions (*eif2b1* forward primer) 5'- GGAGACGTAAAATGTACCTGCAAT-3' and  
549 (*eif2b1* reverse primer) 5'-CACCCCAACCATCACAGGAG-3'; 98°C for 1 m, followed by 34

550 cycles of 98°C for 10s, 58°C for 15s, and 72 for 25s, followed by a final extension step of 72°C  
551 for 10m. Following PCR, the entire 10 µl reaction was digested with Hpy188I in a 15 µl reaction  
552 for 2hrs at 37°C. The digest was then run out on a 2.5% agarose gel. Animals homozygous for  
553 *eif2b1<sup>sa12357/sa12357</sup>* produced a 623 bp mutant band, and a 44 bp band unrelated to the *eif2b1<sup>sa12357</sup>*  
554 allele, used as an internal control for the restriction digest. Wild-type animals, harboring the non-  
555 mutated Hpy188I restriction site, generate a 404 bp and 219 bp band, specific to the wild-type  
556 allele, as well as the 44 bp internal control band; heterozygous animals generate all four bands  
557 after Hpy188I digestion: mutant 623 bp, wild-type 404 bp and 219 bp, and the internal digest  
558 control band 44 bp.

### 559 **Chip Genotyping**

560 Survival genotyping of 72 hpf zebrafish was performed as previously described (Lambert  
561 et al., 2018). Briefly, embryos were loaded individually onto genotyping wells of a ZEG chip  
562 (wFluidx, Inc.) in 12 µl of E3 with a wide bore pipette tip. Once embryos are loaded, the ZEG  
563 chip was placed on the vibration unit, covered with the lid and vibrated for 7.5 minutes at 1.4  
564 volts, 0.026 amps and 0.03 watts. After the samples are vibrated, 10 µl of E3 is removed from the  
565 well into a PCR strip tube. The corresponding embryo is removed from the chip well with a  
566 transfer pipette and a small amount of E3, into a 96 square well plate (650 µl/well) until after  
567 genotyping. For genotyping PCR, 5 µl of E3 is removed from each well is used directly in the  
568 PCR without further cell lysis steps.

### 569 **Cloning and characterization of zebrafish *eif2b5* CRISPR mutants**

570 *eif2b5-ex1* CRISPR injected F0 embryos were raised and crossed to non-mutagenized  
571 wild-type AB siblings. *eif2b5* F1 founder offspring were then raised to adulthood, fin-clipped for  
572 DNA extraction and PCR amplification of the target locus, using the above described HRMA



573 primers for *eif2b5*. Individual fish identified as potential mutants by HRMA were further  
574 confirmed by Topo-TA cloning (Thermo Fisher Scientific) of the target locus, and Sanger  
575 sequencing four clones per animal. To ensure that we did not miss larger mutations at the  
576 CRISPR mutagenesis site, PCR amplification of a larger region surrounding the target locus  
577 (517bp) was performed using the following primers and PCR conditions: (*eif2b5* forward  
578 sequencing primer) 5'- AGCTACCTCAACAGGGCGTA-3', and (*eif2b5* reverse sequencing  
579 primer) 5'- CGTCCAAAAACAAAACAGCA-3'; 98°C for 1 m, followed by 34 cycles of 98°C  
580 for 10s, 60°C for 15s, and 72 for 20s, followed by a final extension step of 72°C for 10m.

### 581 **Cloning of Human *EIF2B2* and *EIF2B5***

582 Human *EIF2B2* and *EIF2B5* were amplified from cDNA prepared from SH-SY5Y  
583 human cell line. The following primers, and PCR conditions were used to amplify *EIF2B2* for  
584 cloning into a middle entry clone Gateway-compatible vector (*EIF2B2* forward primer contains:  
585 31 nt *attB1F* sequence, a 9 nt zebrafish optimized Kozak sequence, and 20 nt region of *EIF2B2*  
586 beginning at the ATG) 5'-  
587 GGGGACAAGTTTGTACAAAAAAGCAGGCTACGCCGCCACCATGCCGGGATCCGCAG  
588 CGAA-3', and (*EIF2B2* reverse primer contains: 30 nt *attB2R* sequence, and a 20 nt region of  
589 the 3' *EIF2B2* that does not contain the stop codon) 5'-  
590 GGGGACCACTTTGTACAAGAAAGCTGGGTCTAAAACATGATCATCAGGAT-3'; PCR  
591 conditions: 98°C for 1 m, followed by 34 cycles of 98°C for 10s, 68°C for 15s, and 72 for 30s,  
592 followed by a final extension step of 72°C for 10m. The following primers, and PCR conditions  
593 were used to amplify *EIF2B5* for Gateway cloning (*EIF2B5* forward primer contains: 31 nt  
594 *attB1F* sequence to allow for Gateway pME cloning, a 9 nt zebrafish optimized Kozak sequence,  
595 and a 20 nt region of *EIF2B5* beginning at the ATG) 5'-

596 GGGGACAAGTTTGTACAAAAAAGCAGGCTACGCCGCCACCATGGCGGCCCCCTGTAG  
597 TGGC-3', and (*EIF2B5* Reverse primer contains: 30 nt *attB2R* sequence to allow for Gateway  
598 pME cloning, and a 20 nt region of the 3' *EIF2B5* that does not contain the stop codon) 5'-  
599 GGGGACCACTTTGTACAAGAAAGCTGGGTCTCAGTCATCTTCAGATGACT-3'; PCR  
600 conditions: 98°C for 1 m, followed by 34 cycles of 98°C for 10s, 68°C for 15s, and 72 for 75s,  
601 followed by a final extension step of 72°C for 10m.

602 The *attB* containing *EIF2B* PCR product were combined with a donor vector (pDonor  
603 #221) in a BP recombination reaction to generate Gateway middle clones, pME *EIF2B2* and  
604 pME *EIF2B5*. These plasmids were then diagnostically digested and sequenced to confirm the  
605 correct cloning. Expression clones were assembled using the Tol2 kit and recombination  
606 reactions with Gateway plasmids. For expression and visualization of human *EIF2B5* (pME  
607 *EIF2B5*) in the zebrafish we used the ubiquitous *Beta actin* enhancer containing a minimal core  
608 promoter (mcp) encoding the viral E1b TATA box fused to the carp b-actin 5' UTR (p5E *Beta*  
609 *actin*) and the viral 2A bicistronic eGFP fluorescent tag (p3E 2A:eGFP) assembled into the  
610 pDestTol2pA2 plasmid.

### 611 **Immunohistochemistry and in situ hybridization**

612 Immunohistochemistry was performed as previously described (Bonkowsky et al., 2008).  
613 Antibodies used were: mouse anti-acetylated tubulin 1:250 (Sigma), mouse monoclonal anti-  
614 GFP 1:250 (Millipore), chicken anti-GFP 1:1000 (Aves Labs), mouse anti-HuC/D 1:400  
615 (ThermoFisher), rabbit anti-dsRed 1:250 (Clontech), Cy-3 anti-rabbit 1:400 (Millipore), Alexa  
616 488 donkey anti-mouse 1:400, Alexa 633 donkey anti-rabbit, Alexa 488 donkey anti-chicken  
617 1:400, Alexa 555 rabbit anti-goat 1:400 (ThermoFisher), and 4',6-diamidino-2-phenylindole  
618 (DAPI).

619 **In situ hybridization**

620 The antisense digoxigenin-labeled cRNA probes for zebrafish *eif2b1-5* were prepared by  
621 using a clone-free method, as previously described (Thisse and Thisse, 2008). Forward and  
622 reverse primers were generated using Primer3 to generate a PCR product between 800-950 nt.

623 The following primers were used: *eif2b1* forward *in situ* primer 5'-

624 CGTTGCATCAGCGACACTAT-3', *eif2b1* reverse *in situ* primer 5'-

625 GAAATGCTTTATAAACAGCAATAATCA-3'; *eif2b2* forward *in situ* primer 5'-

626 CGCAGGTGAACTGATGGAG-3', *eif2b2* reverse *in situ* primer 5'-

627 GATGTTTTGAATGCCAGACG-3'; *eif2b3* forward *in situ* primer 5'-

628 GAGAACAGCGGGACTTTGTC-3', *eif2b3* reverse *in situ* primer 5'-

629 TTCGTCTTCAGGCCTGTTCT-3',; *eif2b4* forward *in situ* primer 5'-

630 GGATCCAATGCTCGATCTGT-3', *eif2b4* reverse *in situ* primer 5'-

631 GAGGGAAGTGTGTGCATCTG-3'; *eif2b5* forward *in situ* primer 5'-

632 TGGTGGTGGGTCCAGATATT-3', *eif2b5* reverse *in situ* primer 5'-

633 CAGCCCGTTGTATTTTCCAG-3'. To generate a PCR product for antisense probe generation,

634 the reverse primer also contains a 32 nt sequence containing; a 9 nt 5' spacer sequence, a 17 nt

635 T7 polymerase sequence, and a 6 nt 3' spacer (5'-

636 CCAAGCTTCTAATACGACTCACTATAGGGAGA -3'), resulting in a PCR product <1kb.

637 Synthesis of digoxigenin-labeled antisense RNA probes were synthesized using a DIG RNA

638 Labeling Kit (SP6/T7; Roche).

639 **Microscopy and image analysis**

640 Immunostained embryos were transferred step-wise into 80% glycerol/20% PBST,  
641 mounted on a glass slide with a #0 coverslip, and imaged on a confocal microscope. Confocal  
642 stacks were projected in ImageJ, and images composed with Adobe Photoshop and Illustrator.

### 643 **TUNEL quantification**

644 Terminal deoxynucleotidyl transferase dUTP nick-end labeling (TUNEL) was performed  
645 on whole-mount larvae (ApopTag Fluorescein *In Situ* Apoptosis Detection Kit; Millipore) as  
646 previously described (Lambert et al., 2012). Confocal imaging was performed and images were  
647 rendered in ImageJ by compiling a max sum projection of 100  $\mu\text{m}$  (step size 2.5  $\mu\text{m}$ ) into a  
648 single z-stack image, for cell counting using Photoshop's (Adobe) count tool.

### 649 **RNA isolation and cDNA synthesis**

650 RNA was isolated from between 50-100 embryos per sample, depending on age. Each  
651 sample was suspended in 900  $\mu\text{l}$  Trizol Reagent (Invitrogen), triturated with a 25-gauge needle  
652 until homogeneous; 270  $\mu\text{l}$  chloroform was added and the sample was centrifuged for 15 m at 4  
653  $^{\circ}\text{C}$ . The aqueous solution was moved to a new tube, an equal volume isopropanol (approximately  
654 500  $\mu\text{l}$ ) was added, and 5  $\mu\text{l}$  Glycoblue (Invitrogen) added, followed by centrifugation for 15 m  
655 at 4  $^{\circ}\text{C}$ . The pellet was washed in 70% ethanol, centrifuged for 10 m at 4  $^{\circ}\text{C}$ , and resuspended in  
656 44  $\mu\text{l}$  DEPC  $\text{H}_2\text{O}$ . To remove DNA, 5  $\mu\text{l}$  DNase I buffer and 1  $\mu\text{l}$  Turbo DNase (Invitrogen) was  
657 added to each sample and incubate for 15 m at 25 $^{\circ}\text{C}$ . The volume was brought to 400  $\mu\text{l}$  with  
658 DEPC  $\text{H}_2\text{O}$ , and an equal volume phenol:chloroform was added, mixed, and centrifuged for 15  
659 m at 4 $^{\circ}\text{C}$ . The aqueous phase was transferred to a new tube and 1.5  $\mu\text{l}$  Glycoblue was added, 1/10  
660 volume 3M NaOAc added, and 2.5x of the total volume of 100% ethanol was added. The sample  
661 was allowed to precipitate overnight at -20  $^{\circ}\text{C}$ . The sample was then centrifuged for 15 m at 4  $^{\circ}\text{C}$ ,  
662 supernatant removed, and the pellet washed in 70% ethanol. This was followed by a final

663 centrifugation step of 15 m at 4 °C, supernatant removed, and the RNA resuspended in 15 µl  
664 DEPC H<sub>2</sub>O.

665 First-strand cDNA was made from 1-5 µg total RNA using the SuperScript III First-  
666 Strand Synthesis System (Applied Biosystems) per manufacturer's instructions.

### 667 **qRT-PCR**

668 All qRT-PCR reactions were performed using SYBR Green PCR master mix (Invitrogen)  
669 and 2 µl cDNA with the following conditions: 50°C for 2 min, 95 for 10 min followed by 39  
670 cycles of 95°C for 20s, 60°C for 20s, and 72 for 20s, followed by a final melt curve step that  
671 ramps in temperature between 60°C and 95°C.

### 672 **Behavior Analysis**

673 Larval behavior analysis was performed on 7 dpf larvae in 96-well square bottom plates  
674 (Krackeler Scientific) using video analysis software (Noldus EthoVision). For spontaneous  
675 behavior, animals were transferred at 6 dpf to the 96-well plate and kept at 28.5°C overnight. At  
676 7 dpf the plate was placed on the video imaging system and animals were allowed to adapt in the  
677 dark for 10 min, and then recording was performed for 5 m (1 min dark and 4 min light).

### 678 **TEM**

679 Following fixation overnight at 4°C (in 2.5% glutaraldehyde; 1% PFA in 0.1M sodium  
680 cacodylate, 8mM CaCl<sub>2</sub>, 2.4% sucrose; pH 7.4), then processed and embedded in plastic as  
681 follows: rinsed 2 X ten minutes in 0.1M sodium cacodylate buffer containing 2.4% sucrose and  
682 8mM CaCl<sub>2</sub>. Tissue was then post-fixed in 2% osmium tetroxide in a 0.1M sodium cacodylate  
683 buffer for 1 hour at room temperature, followed by a rinse for 5 minutes in water filtered through  
684 a 0.22µm millipore filter. Staining was performed *en bloc* for 1 hour at room temperature with

685 saturated aqueous uranyl acetate, that was filtered through a 0.22 $\mu$ m millipore filter. Samples  
686 were dehydrated through a graded series of ethanol, 10 minutes at each step at room temperature.  
687 Tissue was then transitioned through three changes of absolute acetone, 10 min each, followed  
688 by infiltration with with increasing concentrations of plastic (Embed 812) as follows: 1hr,  
689 Plastic:Acetone 1:1; overnight, Plastic:Acetone 3:1, done at room temperature. Final plastic  
690 infiltration was carried out the following day by changing the plastic three times, then placing  
691 tissue vials on a rotator for 1hr and then under vacuum for 1hr. After the third change tissue was  
692 embedded in a fresh plastic in mold with appropriate labels and placed in 60-70°C oven  
693 overnight. Once the plastic was cured the samples were thick sectioned (0.5-1.0 $\mu$ m) and placed  
694 on glass slides; stained with 1% Toluidine Blue-O in 1% borax on a hot plate. Tissue was  
695 sectioned with a diamond knife on a Leica EMUC6 ultramicrotome, picked up on 150 mesh  
696 copper grids and contrasted sequentially with saturated aqueous uranyl acetate followed by  
697 staining with Reynold's lead citrate. Sections were examined on a JEOL 1400+ electron  
698 microscope.

## 699 **MRI**

700 The brains of wild-type (n=6; 7 months old) and *EIF2B5<sup>zc103</sup>* fish (n=6; 5.5 months old)  
701 were dissected leaving the skull, a small piece of the spinal cord, and a small amount of fat tissue  
702 surrounding the brain intact. They were placed in 4% paraformaldehyde and 0.5% magnevist  
703 (gadopentetate dimeglumine) overnight at 4°C on a nutator.

704 MR imaging was performed with a 1.0cm diameter loop-gap radiofrequency transmitter-  
705 receiver and a preclinical 7T MRI scanner (Bruker Biospec) with the microimaging gradient set  
706 (1100mTm<sup>-1</sup>, BGA-6, Bruker). Two primary scans were done to map the T1 and T2 behavior of  
707 the tissue. These scans were 3D turbo spin-echo scans (Rapid Acquisition with Refocused

708 Echoes, RARE), specialized with varying repetition time (TR) or echo time (TE) to optimize T1  
709 and T2 contrast. The T1 map scan utilized the following parameters: T1 weighted RARE: TR =  
710 [50, 150, 275, 450, 600]ms, TE = 12ms, 4 averages, RARE factor = 2, matrix size = 305 x 140 x  
711 165, spatial resolution = 0.036 mm isotropic, field of view: 110mm x 50mm x 60 mm. T2  
712 weighted RARE: TR = 500ms, TE = [12.2, 36.6, 60.94]ms, 9 averages, RARE factor = 2, matrix  
713 size = 305 x 140 x 165, spatial resolution = 0.036 mm isotropic, field of view: 110mm x 50mm x  
714 60 mm. Six zebrafish skulls were scanned in wild type/mutant pairs in the custom coil.

715         The raw intensity data was exported from Paravision 5.1 (Bruker BioSpec). This data was  
716 imported into MATLAB r2017b (Mathworks, Natick MA), and reshaped into two sets of 3D  
717 volumes. For the T1 weighted scan, each volume was representative of an individual TR. For the  
718 T2 weighted scans, each volume was representative of a different TE. With this, a gradient  
719 descent algorithm could be applied to the intensity vs TR, TE curve of each pixel, for the T1, T2  
720 volumes respectively. General parameters were T1: Initial constants:  $M_0 = 8000$ ,  $T_1 = 150$ , Loop  
721 limit = 75000, learning rate=0.000001. Equation:  $S = M_0(1 - e^{TR/T_1})$  T2: Initial constants:  $M_0$   
722 = 8000,  $T_2 = 75$ , Loop limit = 75000, learning rate=0.000001. Equation:  $S = M_0 e^{TE/T_2}$   
723 Sub-millimeter movement was witnessed between the T1 experiments, which caused pixel  
724 intensities to not properly fit to the T1 equation, and blurred in the averaged image. This was  
725 corrected for with simple 2D rigid body transformations between TR experiments, using the  
726 MATLAB r2017b “affine2d” function. A transformation matrix was generated for a single  
727 representative slice, then applied to all slices within the volume. This transformation was  
728 applied to each T1 experiment of a given set and were averaged into a single volume.

729         Transformations matrices were generated with landmark based analysis. Three primary  
730 landmarks were utilized to build the transformation: the center of the lens of each eye and the tip

731 of the vagal lobe. The repetitions were averaged and fitted with the gradient descent algorithm  
732 detailed above. This resulted in two volumes of T1 and T2 values for each scan pair. The skull  
733 pair was separated into two distinct volumes for each T1, T2 map, and rotated into the  
734 anatomical planes for visualization.

735 Analysis of the T1 and T2 maps involved a two-step process of quantifying overall brain  
736 volume, and determining the T1 and T2 values for white matter regions of interest (ROI). To  
737 begin, four representative measurements were taken for each wild type and mutant pair.  
738 Measurements taken were the length from the tip of olfactory bulb to end of the tectum, the  
739 maximum width of the optic tectum, and the maximum height of brain at center ventricle. These  
740 measurements were normalized to the width of the specimen's skull.

741 To measure the intensity of white matter regions in the T2 images, a 2x2 pixel region was  
742 taken from the periventricular grey zone and normalized to a 2x2 pixel region in the optic tectum  
743 from a slice at the end of the rhombencephalic ventricle (RV) of midbrain. Two more slices  
744 were measured moving rostrally from the RV.

#### 745 **Black/Gold Staining**

746 Adult brains were dissected, fixed overnight in 4% PFA, then incubated 1 hr in 5%  
747 sucrose in PBS, overnight in 15% sucrose in PBS, and overnight in 30% sucrose in PBS, prior to  
748 embedding in OCT. Tissues were sectioned at 30 $\mu$ m at -20°C in the cryostat and mounted on  
749 positively charged slides.

750 Black Gold II powder (Millipore) was resuspended in 0.9% NaCl to a final concentration  
751 of 0.3% and preheated to 60°C along with 1% sodium thiosulfate. Tissue sections were brought  
752 to room temperature for 5 minutes, then post-fixed in 10% formalin for 1 hr. Slides were  
753 incubated at 60°C in the pre-warmed Black Gold II solution for 15 minutes. Slides were rinsed



754 1X in tap water for 2 minutes, then incubated in sodium thiosulfate solution (1%) for 3 minutes  
755 at 60°C. After another tap water rinse, slides were dehydrated to 100% EtOH, incubated in 50:50  
756 Hemo-De:EtOH for 3 min, and finally in Hemo-De for 3 min prior to mounting in Cytoseal 60.

### 757 **Statistical Analysis and Blinding**

758           Statistical analyses were performed using Prism6 software (GraphPad). Student's *t*-test  
759 was used for two-way comparisons; comparisons between three or more groups was performed  
760 with ANOVA with post-hoc Tukey's HSD between individual means.

761           Samples were randomly allocated to control or experimental groups, other than required  
762 distribution by genotype (e.g. wild-type embryos were in the wild-type group). Allocation of  
763 samples and animals, data collection, and analysis were performed blinded to genotype and/or  
764 experimental group.

765

766

767 **Acknowledgements**

768 Electron microscopy was performed at the University of Utah Electron Microscopy Core  
769 Laboratory with assistance from N. Chandler and D. Belnap. Confocal imaging was performed  
770 at the University of Utah Fluorescence Microscopy Core Facility, supported in part by an NCCR  
771 Shared Equipment Grant # 1S10RR024761-01. The University of Utah Centralized Zebrafish  
772 Animal Resource (CZAR) provided zebrafish husbandry, and is supported in part by NIH grant #  
773 1G20OD018369-01. Sequencing was performed at the University of Utah DNA Sequencing  
774 Core Facility. CRISPR design and construction was performed at the University of Utah  
775 Mutation Generation and Detection Core.

776

777 **Funding**

778 This work was supported by the National Institutes of Health [grant number R21NS109441]; the  
779 Bray Chair in Child Neurology Research at the University of Utah; and the Brain and Spine  
780 Center of Primary Children's Hospital.

781

782 **Declaration of Competing Interests**

783 JLB is on the board of wFluidx, Inc., owns stock in Orchard Therapeutics, and has consulted for  
784 Bluebird bio, Calico Life Sciences, Denali Therapeutics, Enzyvant, and Neurogene. Otherwise,  
785 the authors have no conflicts of interest to declare.

786

787

788

789 **References**

790 Abbink TEM, Wisse LE, Jaku E, Thiecke MJ, Voltolini-González D, Fritsen H, Bobeldijk S, Ter  
791 Braak TJ, Polder E, Postma NL, Bugiani M, Struijs EA, Verheijen M, Straat N, van der Sluis S,  
792 Thomas AAM, Molenaar D, van der Knaap MS. Vanishing white matter: deregulated integrated  
793 stress response as therapy target. *Ann Clin Transl Neurol.* 2019 Aug;6(8):1407-1422.

794

795 Atzmon A, Herrero M, Sharet-Eshed R, Gilad Y, Senderowitz H, Elroy-Stein O. Drug Screening  
796 Identifies Sigma-1-Receptor as a Target for the Therapy of VWM Leukodystrophy. *Front Mol*  
797 *Neurosci.* 2018;11:336.

798

799 Bond S, Lopez-Lloreda C, Gannon PJ, Akay-Espinoza C, Jordan-Sciutto KL. The Integrated  
800 Stress Response and Phosphorylated Eukaryotic Initiation Factor 2 $\alpha$  in Neurodegeneration. *J*  
801 *Neuropathol Exp Neurol.* 2020 Feb 1;79(2):123-143.

802

803 Bonkowsky, J.L., Wang, X., Fujimoto, E., Lee, J.E., Chien, C.B. and Dorsky, R.I. (2008)  
804 Domain-specific regulation of foxP2 CNS expression by *lefl*. *BMC developmental biology*, 8,  
805 103.

806

807 Brady LK, Wang H, Radens CM, Bi Y, Radovich M, Maity A, Ivan C, Ivan M, Barash Y,  
808 Koumenis C. Transcriptome analysis of hypoxic cancer cells uncovers intron retention in  
809 EIF2B5 as a mechanism to inhibit translation. *PLoS Biol.* 2017 Sep 29;15(9):e2002623.

810

811 Bugiani M, Boor I, Powers JM, Scheper GC, van der Knaap MS. Leukoencephalopathy with  
812 vanishing white matter: a review. *J Neuropathol Exp Neurol*. 2010;69:987-96.  
813  
814 Carra-Dalliere C, Horzinski L, Ayrignac X, et al. Natural history of adult-onset eIF2B-related  
815 disorders: a multicentric survey of 24 cases [in French]. *Rev Neurol (Paris)*. 2011;167:802–811.  
816  
817 Dooves S, Bugiani M, Postma NL, Polder E, Land N, Horan ST, van Deijk AL, van de Kreeke  
818 A, Jacobs G, Vuong C, Klooster J, Kamermans M, Wortel J, Loos M, Wisse LE, Scheper GC,  
819 Abbink TE, Heine VM, van der Knaap MS. Astrocytes are central in the pathomechanisms of  
820 vanishing white matter. *J Clin Invest*. 2016;126:1512-24.  
821  
822 Fogli A, Schiffmann R, Bertini E, Ughetto S, Combes P, Eymard-Pierre E, Kaneski CR, Pineda  
823 M, Troncoso M, Uziel G, Surtees R, Pugin D, Chaunu MP, Rodriguez D, Boespflug-Tanguy O.  
824 The effect of genotype on the natural history of eIF2B-related leukodystrophies. *Neurology*.  
825 2004;62:1509–1517.  
826  
827 Geva M, Cabilly Y, Assaf Y, Mindroul N, Marom L, Raini G, Pinchasi D, Elroy-Stein O. A  
828 mouse model for eukaryotic translation initiation factor 2B-leucodystrophy reveals abnormal  
829 development of brain white matter. *Brain*. 2010;133(Pt 8):2448-61.  
830  
831 Hamilton EMC, van der Lei HDW, Vermeulen G, Gerver JAM, Lourenço CM, Naidu S,  
832 Mierzevska H, Gemke RJB, de Vet HCW, Uitdehaag BMJ, Lissenberg-Witte BI; VWM  
833 Research Group, van der Knaap MS. Natural History of Vanishing White Matter. *Ann*

834 Neurol. 2018;84:274-288.

835

836 Harding HP, Novoa I, Zhang Y, Zeng H, Wek R, Schapira M, Ron D. Regulated translation

837 initiation controls stress-induced gene expression in mammalian cells. Mol Cell. 2000

838 Nov;6(5):1099-108.

839

840 Jennings MD, Pavitt GD. A new function and complexity for protein translation initiation factor

841 eIF2B. Cell Cycle. 2014;13(17):2660-5.

842

843 Krishnamoorthy T, Pavitt GD, Zhang F, Dever TE, Hinnebusch AG. 2001. Tight binding of the

844 phosphorylated alpha subunit of initiation factor 2 (eIF2alpha) to the regulatory subunits of

845 guanine nucleotide exchange factor eIF2B is required for inhibition of translation initiation.

846 Molecular and Cellular Biology 21:5018–5030.

847

848 Kucenas, S., Takada, N., Park, H.C., Woodruff, E., Broadie, K. and Appel, B. (2008) CNS-

849 derived glia ensheath peripheral nerves and mediate motor root development. Nature

850 neuroscience, 11, 143-151.

851

852 Labauge P, Horzinski L, Ayrignac X, Blanc P, Vukusic S, Rodriguez D, Mauguier F, Peter L,

853 Goizet C, Bouhour F, Denier C, Confavreux C, Obadia M, Blanc F, de Sèze J, Fogli A,

854 Boespflug-Tanguy O. Natural history of adult-onset eIF2B-related disorders: a multi-centric

855 survey of 16 cases. Brain. 2009;132(Pt 8):2161-9.

856

857 Lambert, A.M., Bonkowsky, J.L., Masino, M.A. (2012) The conserved dopaminergic  
858 diencephalospinal tract mediates vertebrate locomotor development in zebrafish  
859 larvae, *Journal of Neuroscience*, 32,13488-500.  
860

861 Lambert CJ, Freshner BC, Chung A, Stevenson TJ, Bowles DM, Samuel R, Gale BK,  
862 Bonkowsky JL. An automated system for rapid cellular extraction from live zebrafish embryos  
863 and larvae: Development and application to genotyping. *PLoS One*. 2018 Mar  
864 15;13(3):e0193180.  
865

866 Leegwater PA, Vermeulen G, Ko" nst AA, Naidu S, Mulders J, Visser A, Kersbergen P, Mobach  
867 D, Fonds D, van Berkel CG, Lemmers RJ, Frants RR, Oudejans CB, Schutgens RB, Pronk JC,  
868 van der Knaap MS. 2001. Subunits of the translation initiation factor eIF2B are mutant in  
869 leukoencephalopathy with vanishing white matter. *Nature Genetics* 29:383–388.  
870

871 Lin Y, Pang X, Huang G, Jamison S, Fang J, Harding HP, Ron D, Lin W. Impaired eukaryotic  
872 translation initiation factor 2B activity specifically in oligodendrocytes reproduces the pathology  
873 of vanishing white matter disease in mice. *J Neurosci*. 2014;34:12182-91.  
874

875 Liu R, van der Lei HD, Wang X, Wortham NC, Tang H, van Berkel CG, Mufunde TA, Huang  
876 W, van der Knaap MS, Scheper GC, Proud CG. Severity of vanishing white matter disease does  
877 not correlate with deficits in eIF2B activity or the integrity of eIF2B complexes. *Hum Mutat*.  
878 2011 Sep;32(9):1036-45.  
879

880 Moon SL, Parker R. Analysis of eIF2B bodies and their relationships with stress granules and P-  
881 bodies. *Sci Rep*. 2018 Aug 16;8(1):12264.  
882

883 Pakos-Zebrucka K, Koryga I, Mnich K, Ljujic M, Samali A, Gorman AM. The integrated stress  
884 response. *EMBO Rep*. 2016 Oct;17(10):1374-1395.  
885

886 Park, H.C., Boyce, J., Shin, J. and Appel, B. (2005) Oligodendrocyte specification in zebrafish  
887 requires notch-regulated cyclin-dependent kinase inhibitor function. *The Journal of*  
888 *neuroscience*, 25, 6836-6844.  
889

890 Pronk JC, van Kollenburg B, Scheper GC, van der Knaap MS. Vanishing white matter disease: a  
891 review with focus on its genetics. *Ment Retard Dev Disabil Res Rev*. 2006;12(2):123-8.  
892

893 Sekine Y, Zyryanova A, Crespillo-Casado A, Amin-Wetzel N, Harding HP, Ron D. Paradoxical  
894 Sensitivity to an Integrated Stress Response Blocking Mutation in Vanishing White Matter Cells.  
895 *PLoS One*. 2016 Nov 3;11(11):e0166278.  
896

897 Sidrauski C, Acosta-Alvear D, Khoutorsky A, Vedantham P, Hearn BR, Li H, Gamache K,  
898 Gallagher CM, Ang KK- H, Wilson C, Okreglak V, Ashkenazi A, Hann B, Nader K, Arkin MR,  
899 Renslo AR, Sonenberg N, Walter P. 2013. Pharmacological brake-release of mRNA translation  
900 enhances cognitive memory. *eLife* 2:e00498.  
901

902 Sidrauski C, Tsai JC, Kampmann M, Hearn BR, Vedantham P, Jaishankar P, Sokabe M, Mendez  
903 AS, Newton BW, Tang EL, Verschueren E, Johnson JR, Krogan NJ, Fraser CS, Weissman JS,  
904 Renslo AR, Walter P. Pharmacological dimerization and activation of the exchange factor  
905 eIF2B antagonizes the integrated stress response. *Elife*. 2015;4:e07314.  
906  
907 Sievers, F., Wilm, A., Dineen, D., Gibson, T.J., Karplus, K., Li, W., Lopez, R., McWilliam, H.,  
908 Remmert, M., Soding, J. et al. (2011) Fast, scalable generation of high-quality protein multiple  
909 sequence alignments using Clustal Omega. *Molecular systems biology*, 7, 539.  
910  
911 Simossis, V.A. and Heringa, J. (2005) PRALINE: a multiple sequence alignment toolbox that  
912 integrates homology-extended and secondary structure information. *Nucleic acids research*, 33,  
913 W289-294.  
914  
915 Song H, Haeri S, Vogel H, van der Knaap M, Van Haren K. Postmortem Whole Exome  
916 Sequencing Identifies Novel EIF2B3 Mutation With Prenatal Phenotype in 2 Siblings. *J Child*  
917 *Neurol*. 2017 Sep;32(10):867-870.  
918  
919 Thisse C, Thisse B. High-resolution in situ hybridization to whole-mount zebrafish embryos. *Nat*  
920 *Protoc*. 2008;3(1):59-69.  
921  
922 Tsai JC, Miller-Vedam LE, Anand AA, Jaishankar P, Nguyen HC, Renslo AR, Frost A, Walter  
923 P. 2018. Structure of the nucleotide exchange factor eIF2B reveals mechanism of memory-  
924 enhancing molecule. *Science* 359:eaag0939.



925

926 van der Knaap MS, Barth PG, Gabreëls FJ, Franzoni E, Begeer JH, Stroink H, Rotteveel JJ, Valk

927 J. A new leukoencephalopathy with vanishing white matter. *Neurology*. 1997 Apr;48(4):845-55.

928

929 van der Knaap MS, Kamphorst W, Barth PG, Kraaijeveld CL, Gut E, Valk J. Phenotypic

930 variation in leukoencephalopathy with vanishing white matter. *Neurology*. 1998 Aug;51(2):540-

931 7.

932

933 van der Knaap MS, van Berkel CG, Herms J, van Coster R, Baethmann M, Naidu S, Boltshauser

934 E, Willemsen MA, Plecko B, Hoffmann GF, Proud CG, Scheper GC, Pronk JC. eIF2B-related

935 disorders: antenatal onset and involvement of multiple organs. *Am J Hum Genet*. 2003

936 Nov;73(5):1199-207.

937

938 van der Knaap MS, Pronk JC, Scheper GC. Vanishing white matter disease. *Lancet Neurol*.

939 2006;5:413-23.

940

941 van der Voorn JP, van Kollenburg B, Bertrand G, Van Haren K, Scheper GC, Powers JM, van

942 der Knaap MS. 2005. The unfolded protein response in vanishing white matter disease. *Journal*

943 *of Neuropathology & Experimental Neurology* 64:770–775.

944

945 Van Haren K, van der Voorn JP, Peterson DR, van der Knaap MS, Powers JM. The life and

946 death of oligodendrocytes in vanishing white matter disease. *J Neuropathol Exp Neurol*. 2004

947 Jun;63(6):618-30.

948

949 van Kollenburg B, van Dijk J, Garbern J, Thomas AA, Scheper GC, Powers JM, van der Knaap  
950 MS. 2006. Glia- specific activation of all pathways of the unfolded protein response in vanishing  
951 white matter disease. *Journal of Neuropathology and Experimental Neurology* 65:707–715.

952

953 Watatani Y, Ichikawa K, Nakanishi N, Fujimoto M, Takeda H, Kimura N, Hirose H, Takahashi  
954 S, Takahashi Y. Stress-induced translation of ATF5 mRNA is regulated by the 5'-untranslated  
955 region. *J Biol Chem*. 2008 Feb 1;283(5):2543-53.

956

957 Wisse LE, Penning R, Zaal EA, van Berkel CGM, Ter Braak TJ, Polder E, Kenney JW, Proud  
958 CG, Berkers CR, Altelaar MAF, Speijer D, van der Knaap MS, Abbink TEM. Proteomic and  
959 Metabolomic Analyses of Vanishing White Matter Mouse Astrocytes Reveal Deregulation of ER  
960 Functions. *Front Cell Neurosci*. 2017 Dec 20;11:411.

961

962 Wong YL, LeBon L, Edalji R, Lim HB, Sun C, Sidrauski C. The small molecule ISRIB rescues  
963 the stability and activity of Vanishing White Matter Disease eIF2B mutant complexes. *Elife*.  
964 2018 Feb 28;7.

965

966 Wong YL, LeBon L, Basso AM, Kohlhaas KL, Nikkel AL, Robb HM, Donnelly-Roberts  
967 DL, Prakash J, Swensen AM, Rubinstein ND, Krishnan S, McAllister FE, Haste NV, O'Brien JJ,  
968 Roy M, Ireland A, Frost JM, Shi L, Riedmaier S, Martin K, Dart MJ, Sidrauski C. eIF2B  
969 activator prevents neurological defects caused by a chronic integrated stress response. *Elife*.  
970 2019;8. pii: e42940.

971  
972 Xing, L., Quist, T.S., Stevenson, T.J., Dahlem, T.J. and Bonkowsky, J.L. (2014) Rapid and  
973 efficient zebrafish genotyping using PCR with high-resolution melt analysis. Journal of  
974 visualized experiments : JoVE, e51138.  
975  
976

977

978 **Supplemental Figure 1.** MRI images of adult wild-type control siblings and *eif2b5<sup>zc103/zc103</sup>* fish,  
979 showing decreased head and body size. A) Demonstration of orientation used for length, width,  
980 and height measurements of head. B) MRI images, and quantification, of control compared to  
981 mutant, demonstrating decreased sizes.  
982

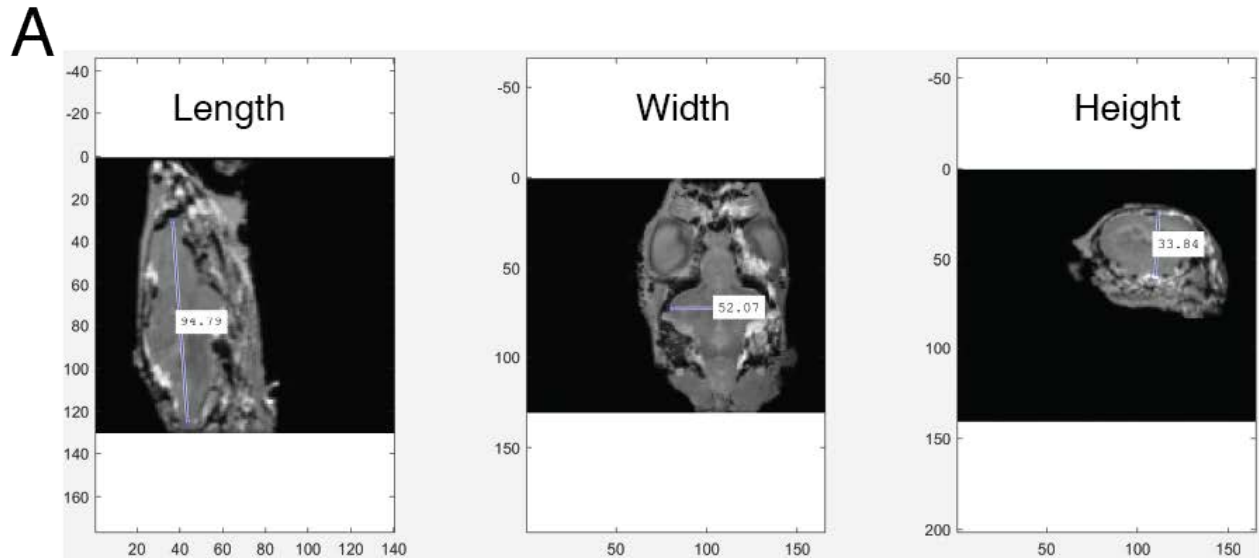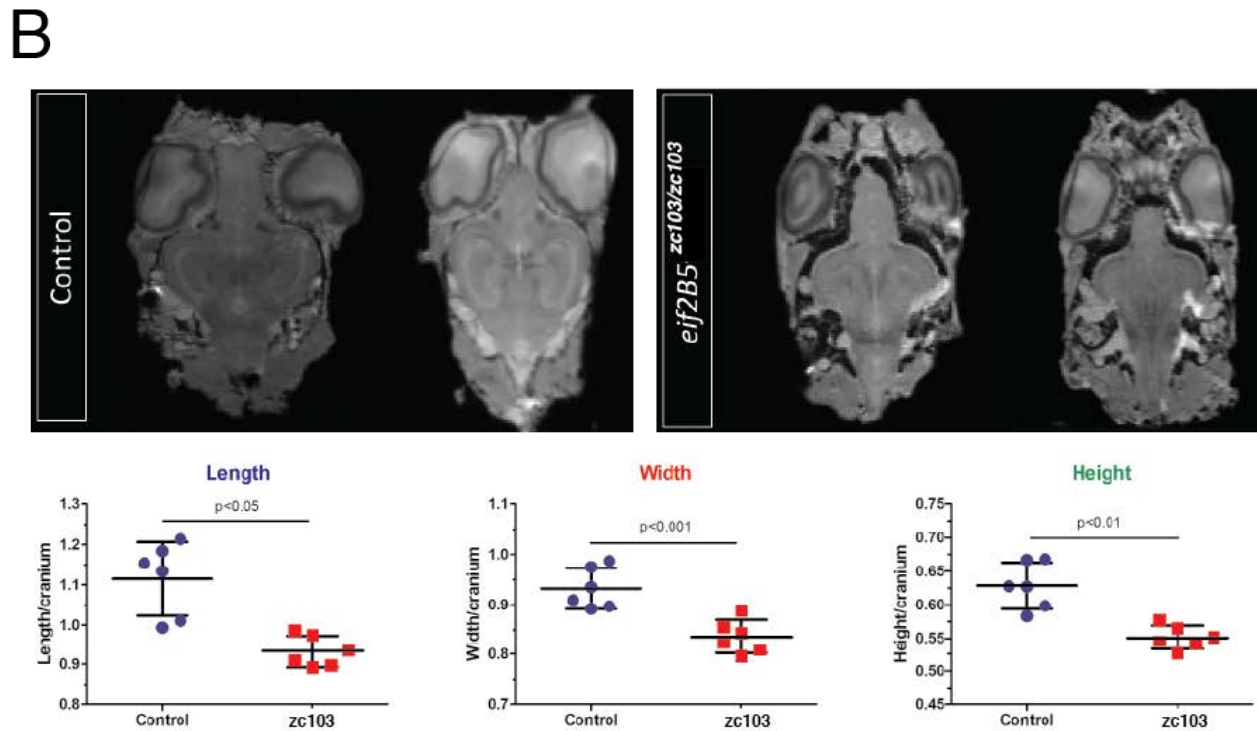

983
